# Supplementary material for: Phylogeography and Antigenic Diversity of Low-Pathogenic Avian Influenza H13 and H16 Viruses
Source: PubMed Central journal article supplement (PMC7307148; doi:10.1128/jvi.00537-20), 2020-06-16
Supplement: JVI.00537-20-s0001.pdf [file JVI.00537-20-s0001.pdf]

## Supplementary Material of

### “Phylogeography and antigenic diversity of low pathogenic avian influenza H13 and H16 viruses”

**Figure S1.** Maximum-Likelihood tree obtained with H13 HA sequences (n=338) and 1000 bootstraps. Virus names in bold were sequenced as part of this study. Those highlighted in red were used for the antigenic analyses. Only bootstrap values higher than 50 are indicated.

**Figure S2.** Maximum clade credibility tree for influenza A virus H13 hemagglutinin subtype (n=338). Posterior probabilities are reported when higher than 0.5. Virus names in bold were sequenced as part of this study. Those highlighted in red were used for the antigenic analyses. Node bars indicate 95% highest posterior density for times of the most recent common ancestors. Scale bar indicates 10 years.

**Figure S3.** World map indicating intercontinental gene flow of influenza A virus H13 hemagglutinin in time. Numbers highlight intercontinental gene flow events as detailed in Table 2 and Figure 1. Arrows indicate direction of gene flow. Colors indicate time interval between the most recent common ancestor (MRCA) and the detected H13 LPAIV. Continuous line: posterior probability of  $>0.95$ ; dotted line: posterior probability of  $\leq 0.95$ . Map from amCharts, <https://www.amcharts.com/svg-maps/?map=world>; CC BY-NC 4.0.

**Figure S4.** Maximum-Likelihood tree obtained with H16 HA sequences (n=192) and 1000 bootstraps. Virus names in bold were sequenced as part of this study. Those highlighted in red were used for the antigenic analyses. Only bootstrap values higher than 90 are indicated.

**Figure S5.** Maximum clade credibility tree for influenza A virus H16 hemagglutinin subtype (n=192). Posterior probabilities are reported when higher than 0.5. Virus names in bold were sequenced as part of this study. Those highlighted in red were used for the antigenic analyses. Node bars indicate 95% highest posterior density for times of the most recent common ancestors. Scale bar indicates 10 years.

**Figure S6.** World map indicating intercontinental gene flow of influenza A virus H16 hemagglutinin in time. Numbers highlight intercontinental gene flow events as detailed in Table 3 and Figure 2. Arrows indicate direction of gene flow. Colors indicate time interval between the most recent common ancestor (MRCA) and the detected H16 LPAIV. Continuous line: posterior probability of  $>0.95$ ; dotted line: posterior probability of  $\leq 0.95$ . Map from amCharts, <https://www.amcharts.com/svg-maps/?map=world>; CC BY-NC 4.0.

**Table S1.** Distribution of influenza A virus subtypes among gull species in Eurasia and America based on the Influenza Research Database (IRD, <https://www.fludb.org>) (d.d. 20-Dec-2019). Subtype not detected (-)

**Table S2.** List of H13 HA influenza A viruses (n=519) and corresponding accession number included in the study. Virus names in bold were sequenced as part of this study.

**Table S3.** List of H16 HA influenza A viruses (n=276) and corresponding accession numbers included in the study. Virus names in bold were sequenced as part of this study.











Figure S3

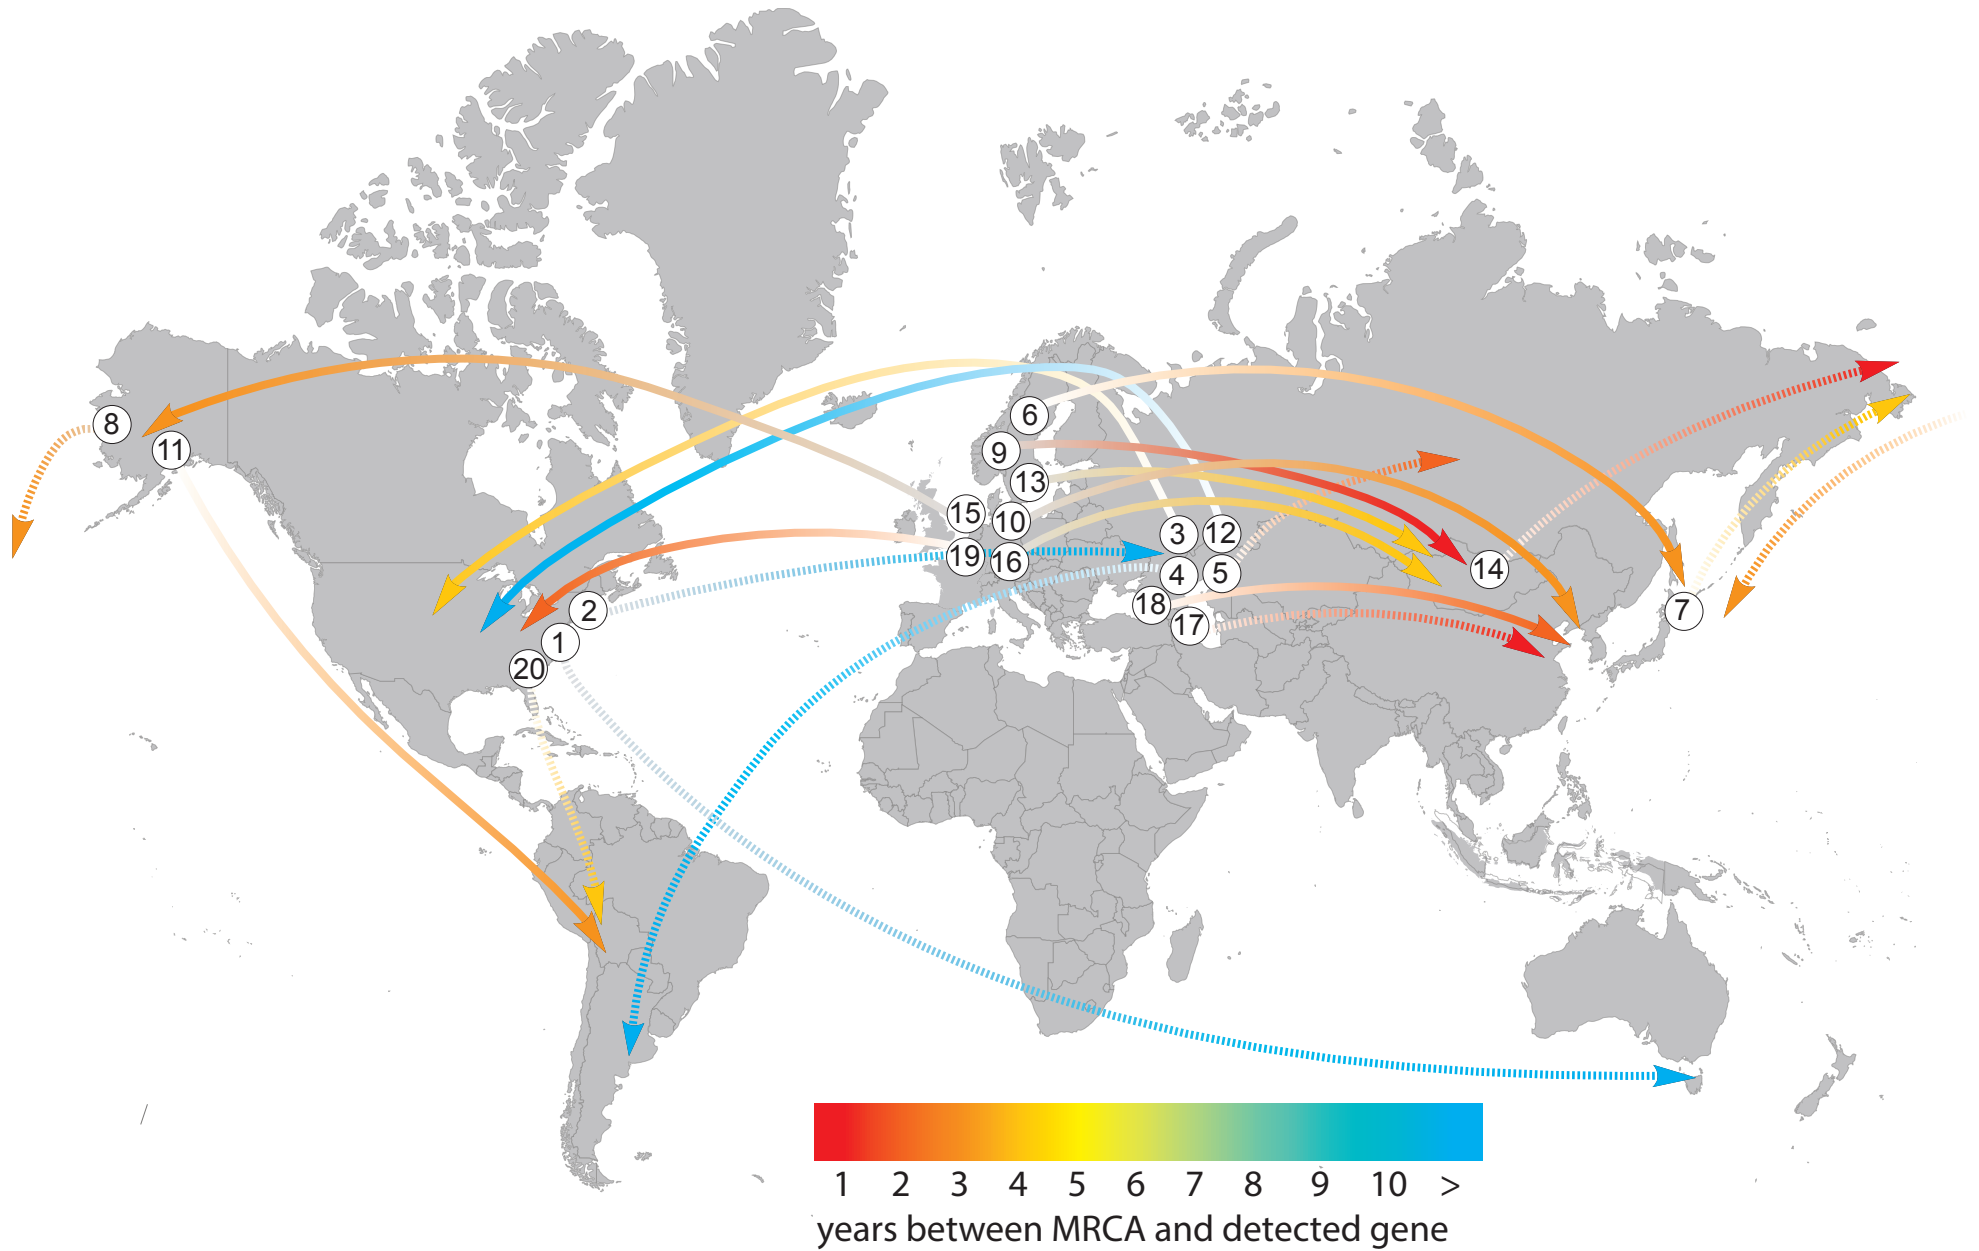

Figure S4

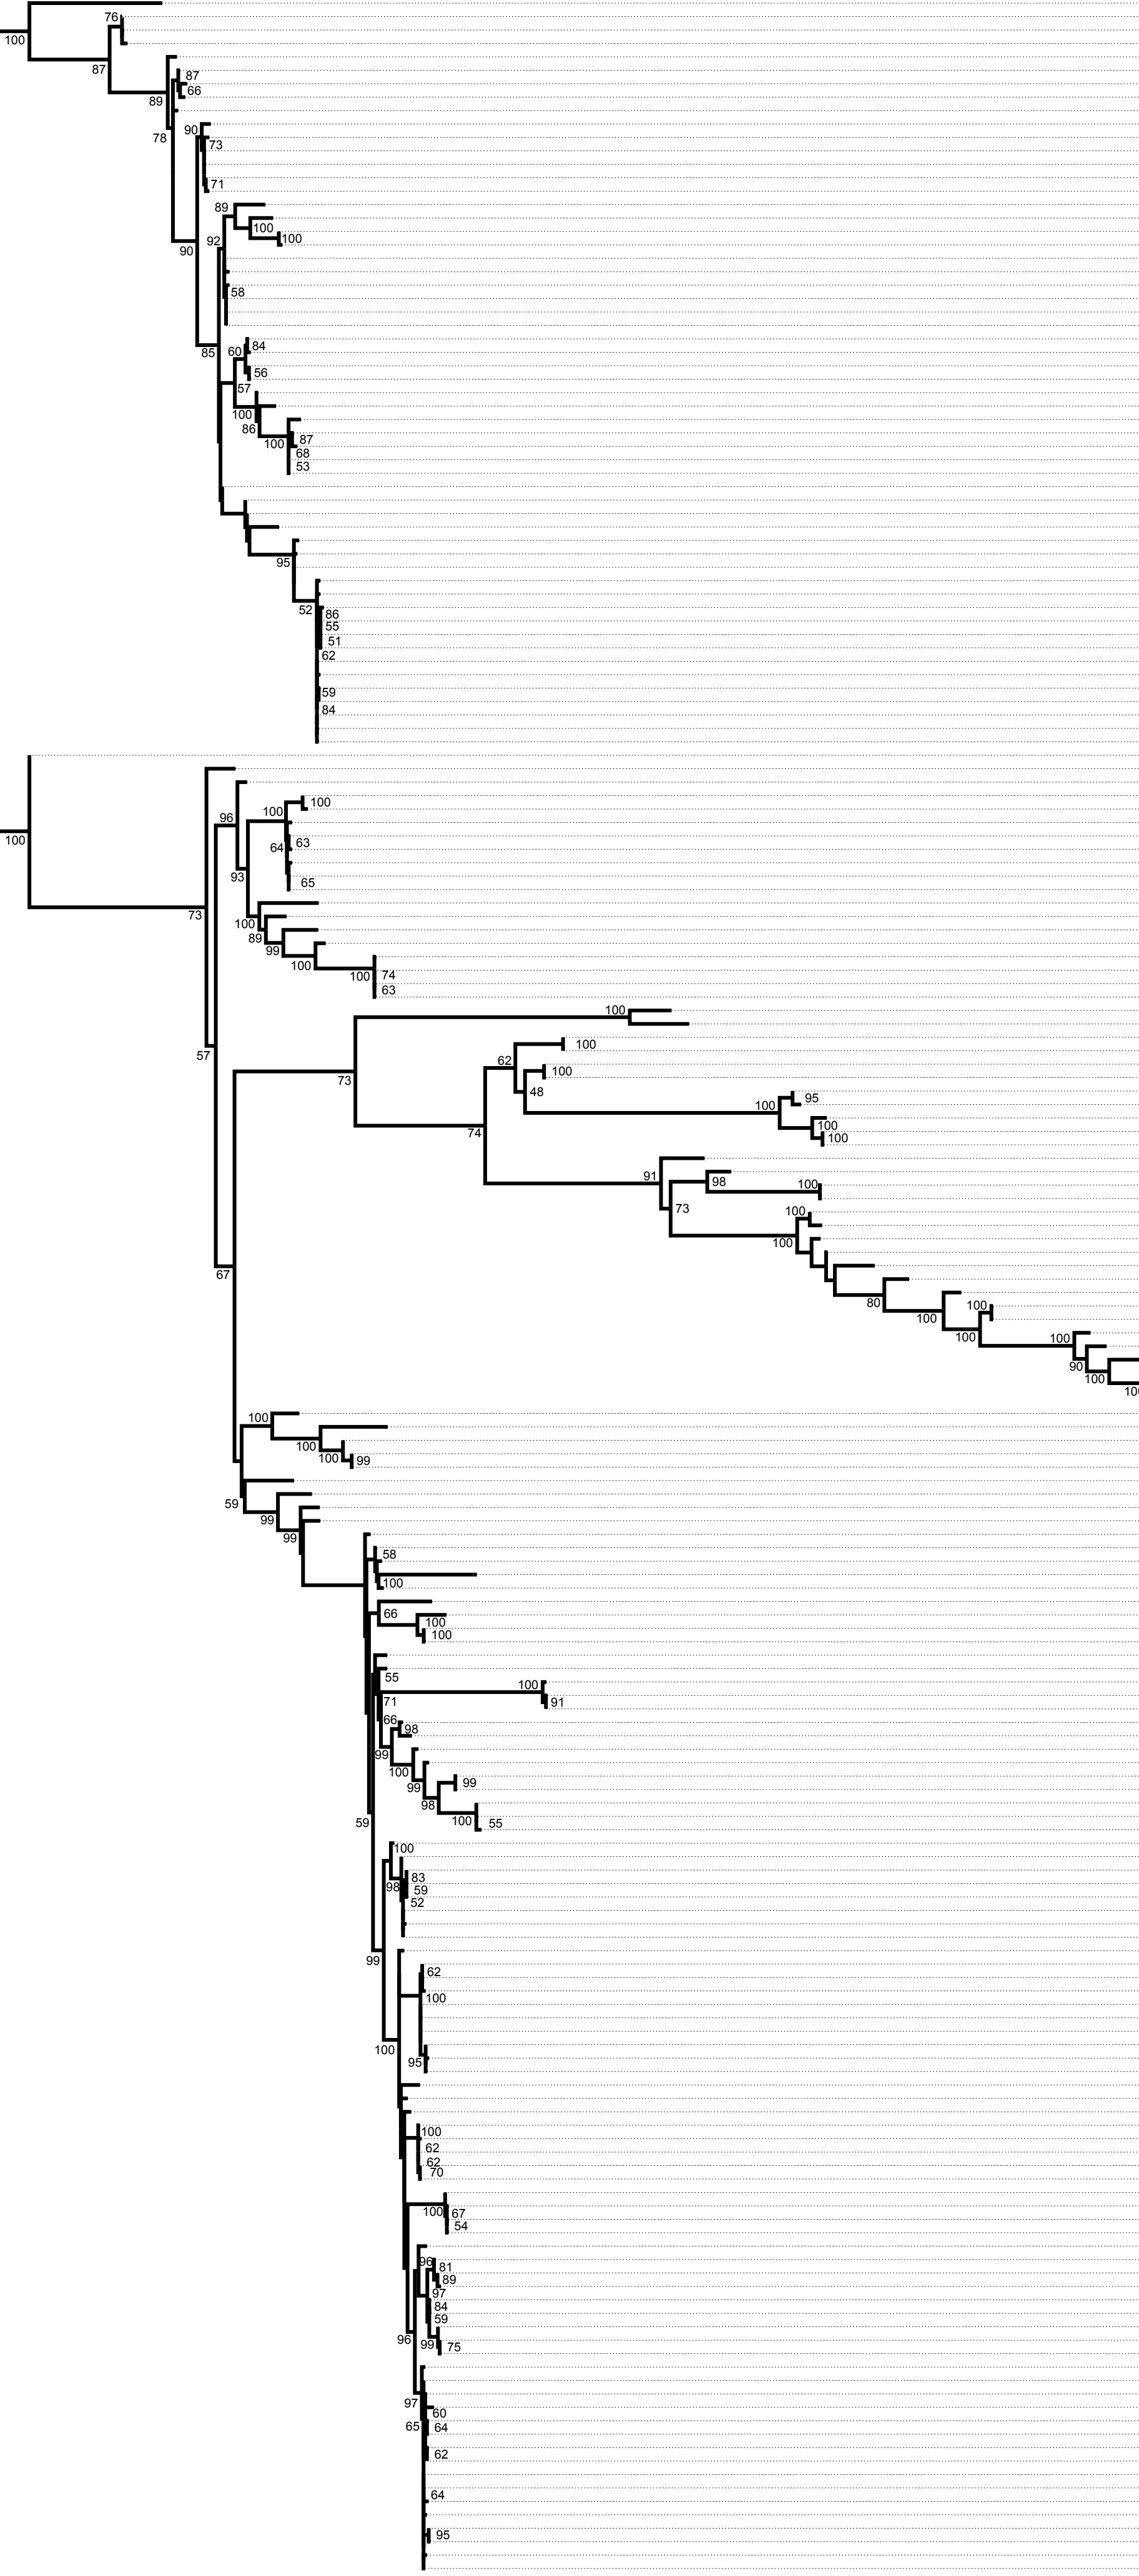

- A/Mallard/Gurjev785/1983 H16N3 EU148600
- A/Black-headed Gull/Sweden/4/1999 H16N3 AY684890
- A/Black-headed Gull/Sweden/2/1999 H16N3 AY684888
- A/Black-headed Gull/Sweden/3/1999 H16N3 AY684889
- A/Black-headed Gull/Sweden/9479/2005 H16N3 MK027212
- A/Black-headed Gull/Sweden/9478/2005 H16N3 MK027211
- A/Black-headed Gull/Sweden/9502/2005 H16N3 KR087607
- A/Black-headed Gull/Sweden/9492/2005 H16N3 KR087606
- A/Black-headed Gull/Sweden/9476/2005 H16N3 KR087605
- A/Black-headed Gull/Netherlands/3/2007 H16N3 KR087610
- A/Black-headed Gull/Netherlands/9/2007 H16N3 KR087613
- A/Black-headed Gull/Netherlands/8/2007 H16N3 KR087612
- A/Black-headed Gull/Netherlands/5/2007 H16N3 KR087611
- A/Black-headed Gull/Netherlands/7/2007 H16N3 KX978760
- A/Black-headed Gull/Netherlands/1/2007 H16N3 KR087609
- A/Black-headed Gull/Netherlands/114/2012 H16N3 KX977892
- A/Black-headed Gull/Netherlands/36/2014 H16N3 MF575190
- A/Black-headed Gull/Netherlands/3/2016 H16N3 MF694124
- A/Black-headed Gull/Netherlands/1/2016 H16N3 MF694134
- A/Black-headed Gull/Netherlands/24/2009 H16N3 MF103719
- A/Black-headed Gull/Netherlands/28/2009 H16N3 KX977785
- A/Black-headed Gull/Netherlands/10/2009 H16N3 KR087614
- A/Black-headed Gull/Netherlands/19/2009 H16N3 KX978033
- A/Black-headed Gull/Netherlands/21/2009 H16N3 KR087615
- A/Black-headed Gull/Netherlands/35/2009 H16N3 KX979094
- A/Black-headed Gull/Netherlands/27/2011 H16N3 MF146675
- A/Black-headed Gull/Netherlands/32/2011 H16N3 KX979603
- A/Black-headed Gull/Netherlands/30/2011 H16N3 MF145738
- A/Black-headed Gull/Netherlands/11/2011 H16N3 MF147513
- A/Black-headed Gull/Netherlands/29/2011 H16N3 KX979432
- A/Black-headed Gull/Netherlands/93/2012 H16N3 KX979159
- A/Black-headed Gull/Netherlands/1/2015 H16N3 MF147650
- A/Black-headed Gull/Netherlands/5/2013 H16N3 KX978693
- A/Black-headed Gull/Netherlands/4/2013 H16N3 KX979151
- A/Black-headed Gull/Netherlands/3/2013 H16N3 KX978186
- A/Black-headed Gull/Netherlands/2/2013 H16N3 KX977836
- A/Black-headed Gull/Netherlands/100/2008 H16N3 MF147121
- A/Black-headed Gull/Netherlands/101/2008 H16N3 KX978252
- A/Black-headed Gull/Netherlands/99/2008 H16N3 KX978955
- A/Black-headed Gull/Netherlands/13/2011 H16N3 KX978398
- A/Black-headed Gull/Netherlands/63/2008 H16N3 KX979453
- A/Black-headed Gull/Netherlands/92/2008 H16N3 KX978323
- A/Black-headed Gull/Netherlands/43/2008 H16N3 MF147250
- A/Black-headed Gull/Netherlands/29/2008 H16N3 MF146193
- A/Black-headed Gull/Netherlands/28/2008 H16N3 MF146238
- A/Black-headed Gull/Netherlands/69/2008 H16N3 MF145725
- A/Black-headed Gull/Netherlands/50/2008 H16N3 MF145888
- A/Black-headed Gull/Netherlands/72/2008 H16N3 MF146541
- A/Black-headed Gull/Netherlands/59/2008 H16N3 MF147239
- A/Black-headed Gull/Netherlands/46/2008 H16N3 MF146816
- A/Black-headed Gull/Netherlands/33/2008 H16N3 MF148040
- A/Black-headed Gull/Netherlands/62/2008 H16N3 MF147547
- A/Black-headed Gull/Netherlands/76/2008 H16N3 MF146737
- A/Black-headed Gull/Netherlands/42/2008 H16N3 MF147574
- A/Black-headed Gull/Netherlands/27/2008 H16N3 MF146654
- A/Black-headed Gull/Netherlands/26/2008 H16N3 MF147314
- A/Black-headed Gull/Sweden/9504/2005 H16N3 KR087608
- A/Herring Gull/Norway/101623/2006 H16N3 FM179756
- A/Black-headed Gull/Mongolia/1756/2006 H16N3 GQ907294
- A/Black-headed Gull/Netherlands/14/2010 H16N3 KX977766
- A/Black-headed Gull/Netherlands/9/2010 H16N3 KX978651
- A/Black-headed Gull/Netherlands/12/2009 H16N3 MF147927
- A/Black-headed Gull/Netherlands/15/2009 H16N3 MF146410
- A/Black-headed Gull/Netherlands/19/2009 H16N3 MF146148
- A/Black-headed Gull/Netherlands/26/2009 H16N3 KR087572
- A/Black-headed Gull/Netherlands/14/2009 H16N3 KX978997
- A/Black-headed Gull/Netherlands/23/2009 H16N3 MF146268
- A/Black-headed Gull/Netherlands/22/2009 H16N3 KX978709
- A/Great black-backed Gull/Netherlands/1/2008 H16N3 MF146805
- A/Black-headed Gull/Republic of Georgia/4/2012 H16N3 CY185585
- A/Black-headed Gull/Netherlands/37/2011 H16N3 MF146714
- A/Black-headed Gull/Netherlands/5/2015 H16N3 KX977739
- A/Black-headed Gull/Netherlands/2/2015 H16N3 KX978663
- A/Black-headed Gull/Netherlands/3/2015 H16N3 KX978028
- A/Black-headed Gull/Netherlands/4/2015 H16N3 KX978525
- A/Environment/Rhododendron/WNRC182872-06/2006 H16N3 CY122476
- A/Environment/Alaska/NWRC184854-12/2006 H16N3 CY122507
- A/Fulica atra/Volga/635/1986 H16N3 EU564109
- A/Black-headed Gull/Turkmenistan/13/1976 H16N3 EU293864
- A/Teal/Volga/671/1986 H16N3 EU148602
- A/Slender-billed Gull/Astrakhan/28/1976 H16N3 EU293865
- A/Black-headed Gull/Sweden/5/1999 H16N3 AY684891
- A/Duck/Hokkaido/WZ82/2013 H16N3 LC339707
- A/Little Tern/Sweden/55316/2006 H16N3 KR087616
- A/Wildbird/Sweden/1/2005 H16N3 KR087602
- A/Wildbird/Sweden/2/2005 H16N3 KR087603
- A/Black-legged Kittiwake/Alaska/295/1975 H16N3 CY015160
- A/Gull/MD/4985/79 H16-mixed KF612964
- A/Herring Gull/DelawareBay/2617/1987 H16N3 CY136606
- A/Laughing Gull/DelawareBay/2623/1987 H16N3 CY136614
- A/Shorebird/New Jersey/840/1986 H16N3 CY014599
- A/Herring Gull/New Jersey/780/1986 H16N3 CY136590
- A/Laughing Gull/DelawareBay/2839/1987 H16N3 CY136630
- A/Herring Gull/Delaware/712/1988 H16N3 CY136729
- A/Gull/NJ/48/92 H16-mixed KF612961
- A/Herring Gull/NJ/61/90 H16-mixed KF612962
- A/Laughing Gull/DelawareBay/296/1998 H16N3 CY127445
- A/Herring Gull/New York/A100-532/2000 H16N3 CY144178
- A/Waterfowl/GA/96623-7/01 H16N3 KF612963
- A/Glaucous Gull/Alaska/44198-027/2006 H16N3 HM059998
- A/Environment/Utah/NWRC184989-18/2006 H16N3 CY122509
- A/Glaucous-winged Gull/SoutheasternAlaska/10JR01700R/2010 H16N3 CY130509
- A/Glaucous-winged Gull/SoutheasternAlaska/10JR01811R/2010 H16N3 CY130517
- A/Gull/SoutheasternAlaska/10JR01527R/2010 H16N3 CY130485
- A/Glaucous-winged Gull/SoutheasternAlaska/10JR01572R/2010 H16N3 CY130493
- A/Gull/Denmark/681/2002 H16N3 GQ247872
- A/Wildbird/Quebec/02916-1/2009 H16N3 CY125606
- A/Shorebird/Delaware/168/2006 H16N3 EU030976
- A/Environment/New Hampshire/NWRC182016-06/2006 H16N3 CY122448
- A/Environment/CO/492008/07 H16N3 KF612965
- A/Common Gull/Norway/101617/2006 H16N3 FM179755
- A/Herring Gull/Finland/13022/2005 H16N3 KX455114
- A/European Herring Gull/Netherlands/5/2006 H16N3 MF147450
- A/LittleTern/Sweden/8897/2005 H16N3 KR087604
- A/Black-headed Gull/Netherlands/32/2009 H16N3 KX979111
- A/Black-headed Gull/Netherlands/11/2010 H16N3 KX977650
- A/European Herring Gull/Netherlands/1/2010 H16N3 KX979488
- A/European Herring Gull/Netherlands/3/2015 H16N3 MF693968
- A/Black-headed Gull/Netherlands/3/2010 H16N3 KX978612
- A/Duck/Hokkaido/WZ82/2013 H16N3 AB937721
- A/Lesser black-backed Gull/Netherlands/1/2015 H16N3 MF694110
- A/Black-headed Gull/Netherlands/18/2014 H16N3 MF146608
- A/European Herring Gull/Netherlands/2/2014 H16N3 MF147061
- A/Black-headed Gull/Iceland/713/2010 H16N3 CY138145
- A/Herring Gull/Newfoundland/GR032/2010 H16N3 KC845043
- A/Brown-hooded gull/Chile/C8851/2016 H16N3 MH498904
- A/Franklins gull/Chile/C10794/2016 H16N3 MH134665
- A/Franklins gull/Chile/C10784/2016 H16N3 MH134702
- A/Gull/Massachusetts/13WP00522/2013 H16N3 CY195833
- A/Ruddy Turnstone/New Jersey/A113-2872/2013 H16N3 MH502494
- A/Gull/Massachusetts/12JR00662/2012 H16N3 CY195655
- A/Laughing Gull/New Jersey/A113-1937/2013 H16N3 MH501070
- A/Gull/New Jersey/UGA115-3414/2015 H16N3 MH501022
- A/Gull/New Jersey/UGA115-3459/2015 H16N3 MH501038
- A/Environment/New Jersey/UGA116-0887/2016 H16-mixed CY240896
- A/Environment/New Jersey/UGA116-1048/2016 H16N3 CY240948
- A/Environment/New Jersey/UGA116-0787/2016 H16N3 CY240828
- A/Glaucous-winged Gull/Southcentral Alaska/11JR0366/2011 H16N3 CY196403
- A/Glaucous-winged Gull/Southcentral Alaska/11JR01871/2011 H16N3 CY196563
- A/Glaucous-winged Gull/Southcentral Alaska/11JR01859/2011 H16N3 CY196555
- A/Glaucous-winged Gull/Southcentral Alaska/10JR01814/2010 H16N3 CY196009
- A/Glaucous-winged Gull/Southcentral Alaska/11JR01852/2011 H16N3 CY196547
- A/Glaucous-winged Gull/Southcentral Alaska/11JR02272/2011 H16N3 CY196603
- A/Glaucous-winged Gull/Southcentral Alaska/11JR01722/2011 H16-mixed CY195614
- A/Glaucous-winged Gull/Southcentral Alaska/11JR01732/2011 H16N3 CY196483
- A/Environment/California/1242V/2012 H16N3 CY176997
- A/Glaucous-winged Gull/Southcentral Alaska/12NH01538/2008 H16N3 CY196772
- A/Glaucous-winged Gull/Southcentral Alaska/12NH01593/2008 H16N3 CY196788
- A/Glaucous-winged Gull/Southcentral Alaska/12MB01812/2012 H16N3 CY206886
- A/Glaucous-winged Gull/Southcentral Alaska/12NH01518/2008 H16N3 CY196764
- A/Glaucous-winged Gull/Southcentral Alaska/12NH01679/2008 H16N3 CY196812
- A/Glaucous-winged Gull/Southcentral Alaska/12NH01632/2012 H16N3 CY195793
- A/Glaucous-winged Gull/Southcentral Alaska/12MB01573/2012 H16N3 CY195671
- A/Glaucous-winged Gull/Southcentral Alaska/12MB01823/2012 H16N3 CY195711
- A/Glaucous-winged Gull/Southcentral Alaska/12NH01285/2008 H16N3 CY196756
- A/California Gull/California/1196P/2013 H16N3 CY177441
- A/Glaucous-winged Gull/Southcentral Alaska/12NH01647/2008 H16N3 CY196804
- A/Glaucous-winged Gull/Southcentral Alaska/13MB02556/2013 H16N3 CY213727
- A/Glaucous-winged Gull/Southcentral Alaska/13MB02526/2013 H16N3 CY213711
- A/Glaucous-winged Gull/Southcentral Alaska/13MB02527/2013 H16N3 CY213719
- A/Glaucous-winged Gull/Southcentral Alaska/13MB02593/2013 H16N3 CY213759
- A/Sandpiper/Southcentral Alaska/16MB01145/2016 H16-mixed CY213504
- A/Glaucous-winged Gull/Southcentral Alaska/15MB01758/2015 H16N3 CY213679
- A/Glaucous-winged Gull/Southcentral Alaska/15MB01735/2015 H16N3 CY213551
- A/Glaucous-winged Gull/Southcentral Alaska/15MB01747/2015 H16N3 CY213671
- A/Glaucous-winged Gull/Southcentral Alaska/15MB01680/2015 H16N3 CY213655
- A/Northern pintail/Alaska/886/2014 H16N3 KT338585
- A/Glaucous-winged Gull/Southcentral Alaska/16MB03160/2016 H16N3 CY239392
- A/Glaucous-winged Gull/Southcentral Alaska/16MB02936/2016 H16N3 CY239320
- A/Glaucous-winged Gull/Southcentral Alaska/16MB0033/2016 H16N3 CY239269
- A/Glaucous-winged Gull/Southcentral Alaska/16MB02960/2016 H16N3 CY239344
- A/Glaucous-winged Gull/Southcentral Alaska/16MB00031/2016 H16N3 CY239376
- A/Glaucous-winged Gull/Southcentral Alaska/16MB03039/2016 H16N3 CY239360
- A/Glaucous-winged Gull/Southcentral Alaska/16MB03027/2016 H16N3 CY239352
- A/Glaucous-winged Gull/Southcentral Alaska/16MB03089/2016 H16N3 CY239384
- A/Glaucous-winged Gull/Southcentral Alaska/14MB01770/2014 H16N3 CY206950
- A/Glaucous-winged Gull/Southcentral Alaska/14MB01438/2014 H16N3 CY206926
- A/Glaucous-winged Gull/Southcentral Alaska/14MB01417/2014 H16N3 CY206902
- A/Glaucous-winged Gull/Southcentral Alaska/14MB01363/2014 H16N3 CY206886
- A/Glaucous-winged Gull/Southcentral Alaska/14MB01615/2014 H16N3 CY206934
- A/Glaucous-winged Gull/Southcentral Alaska/14MB01926/2014 H16N3 CY206990
- A/Glaucous-winged Gull/Southcentral Alaska/14MB01959/2014 H16N3 CY206998
- A/Glaucous-winged Gull/Southcentral Alaska/14MB01306/2014 H16N3 CY206870
- A/Glaucous-winged Gull/Southcentral Alaska/14MB01884/2014 H16N3 CY206966
- A/Glaucous-winged Gull/Southcentral Alaska/14MB01893/2014 H16N3 CY206982
- A/Glaucous-winged Gull/Southcentral Alaska/14MB01444/2014 H16N3 CY239304
- A/Glaucous-winged Gull/Southcentral Alaska/14MB01886/2014 H16N3 CY206974
- A/Glaucous-winged Gull/Southcentral Alaska/14MB00623/2014 H16N3 CY206862
- A/Glaucous-winged Gull/Southcentral Alaska/14MB01336/2014 H16N3 CY206677
- A/Glaucous-winged Gull/Southcentral Alaska/14MB01318/2014 H16N3 CY206678
- A/Glaucous-winged Gull/Southcentral Alaska/14MB02018/2014 H16N3 CY207006



Figure S5

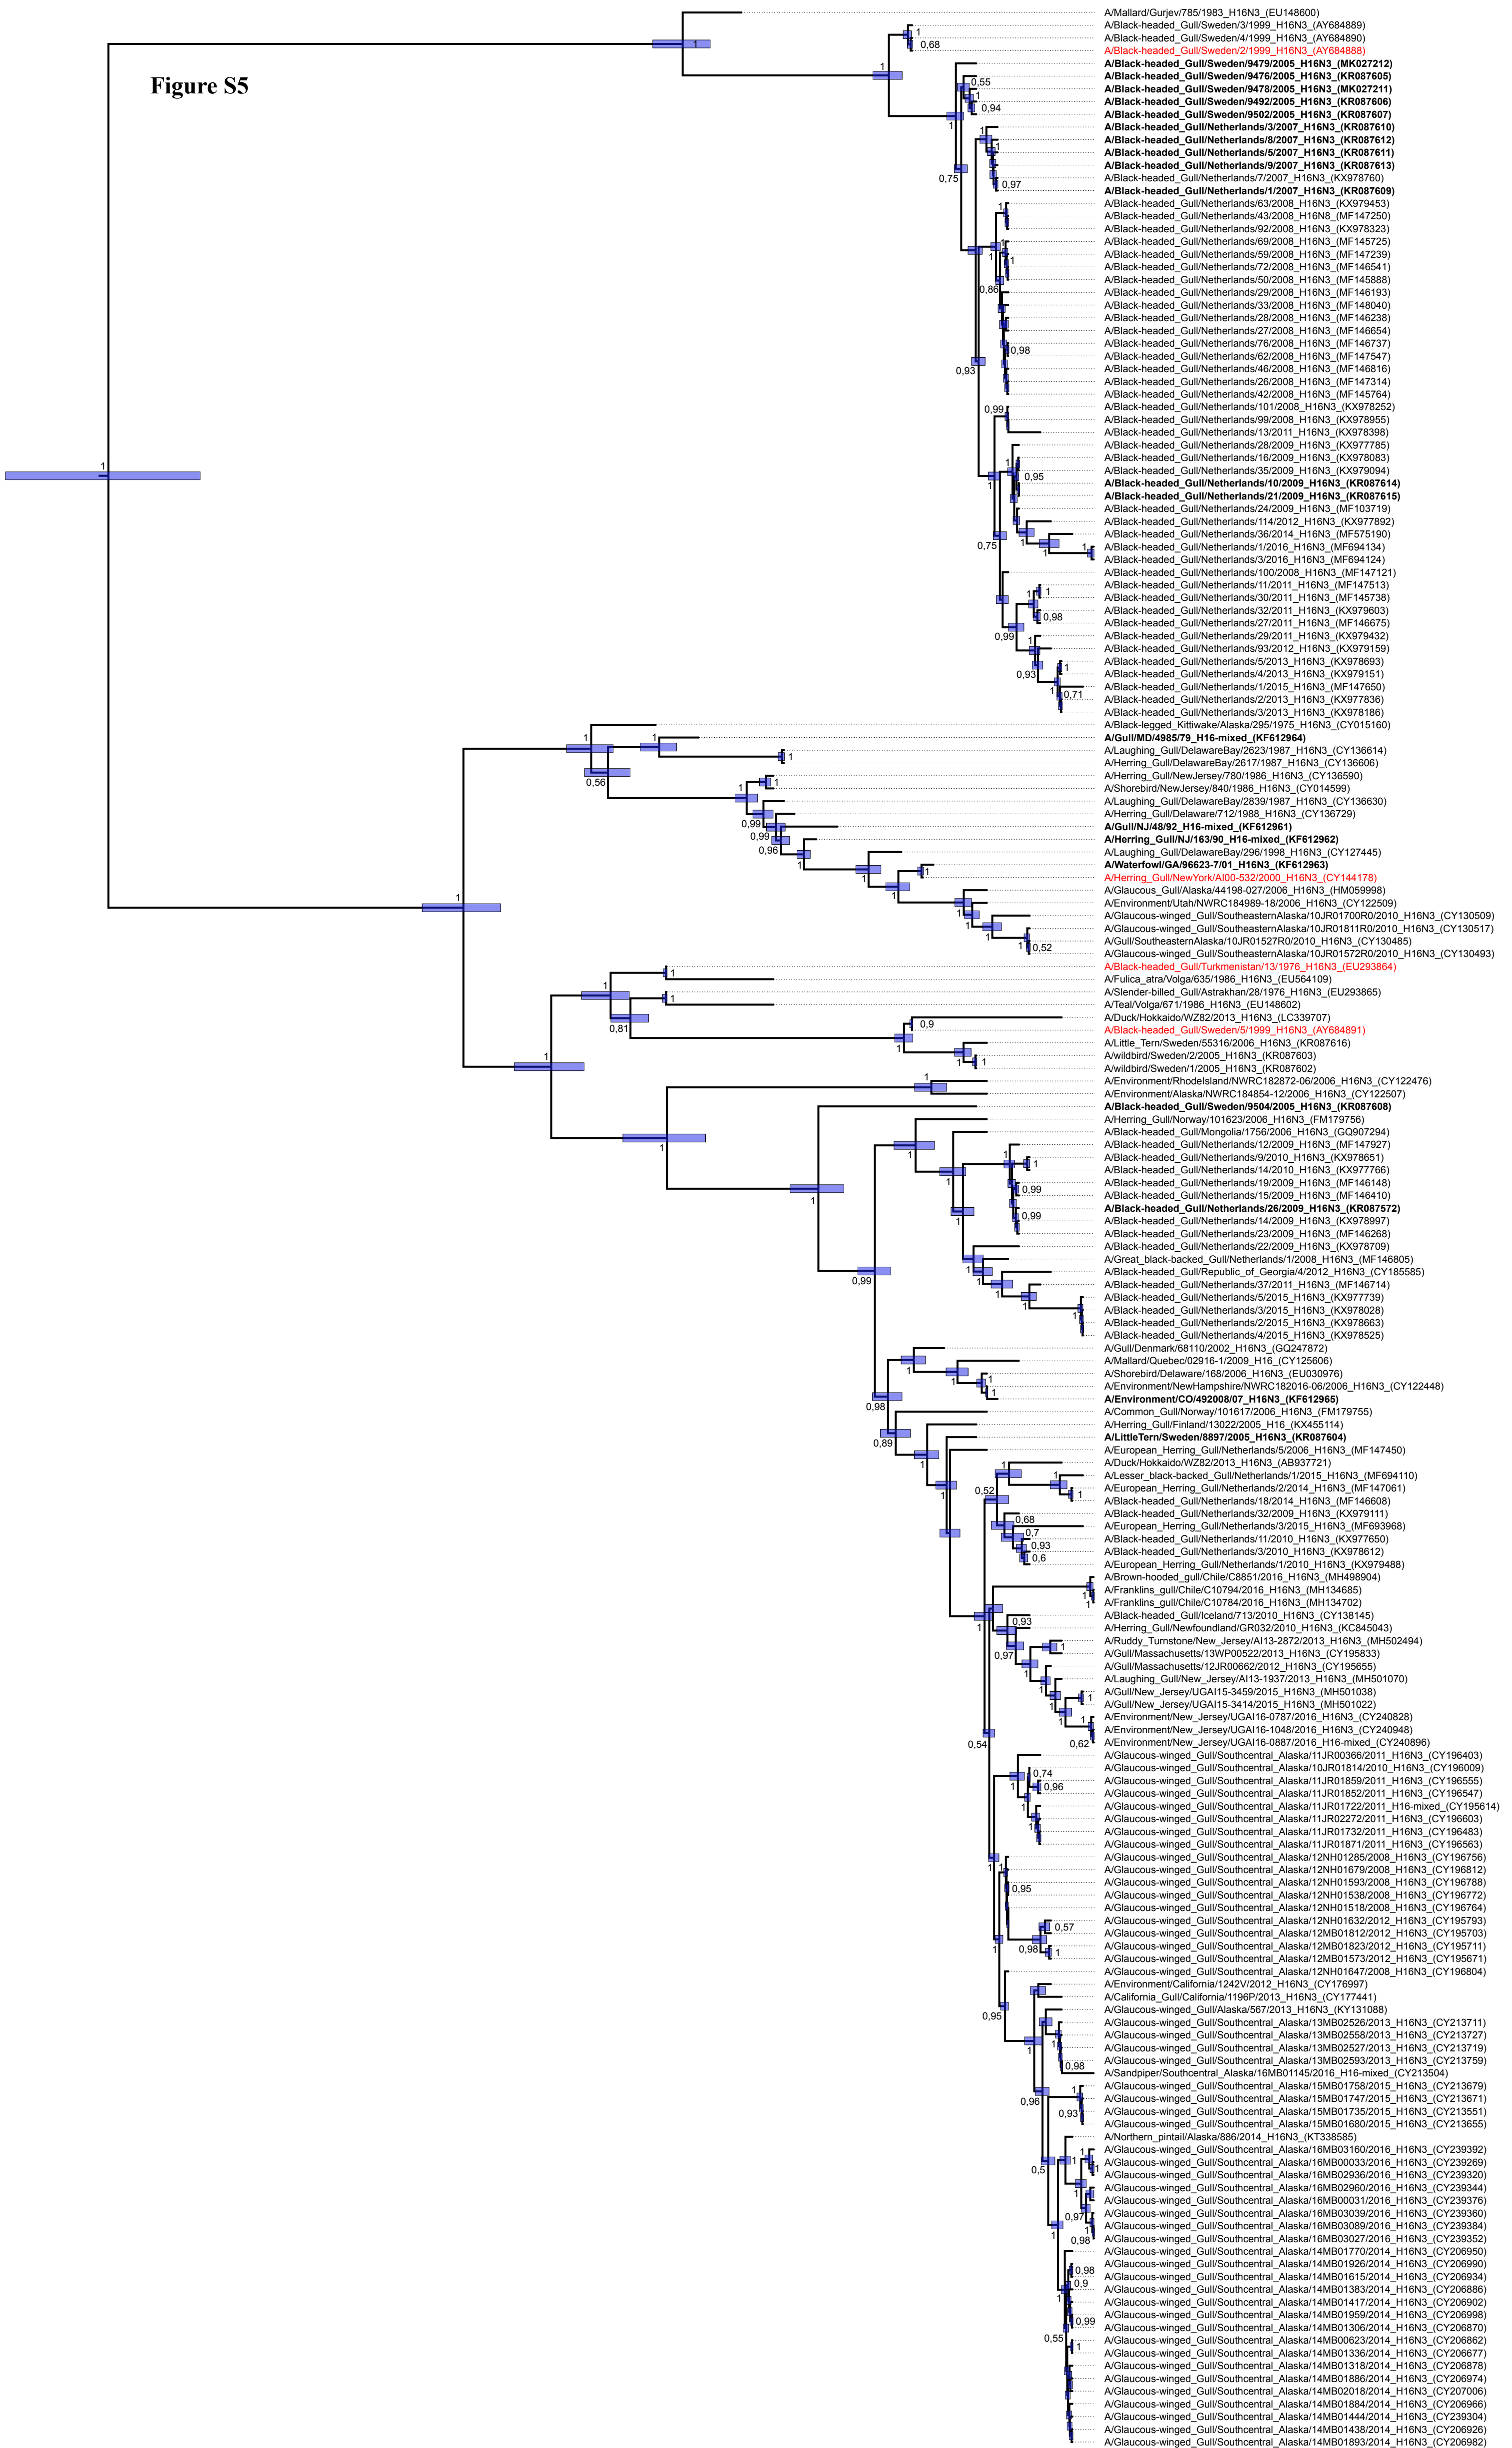

Figure S6

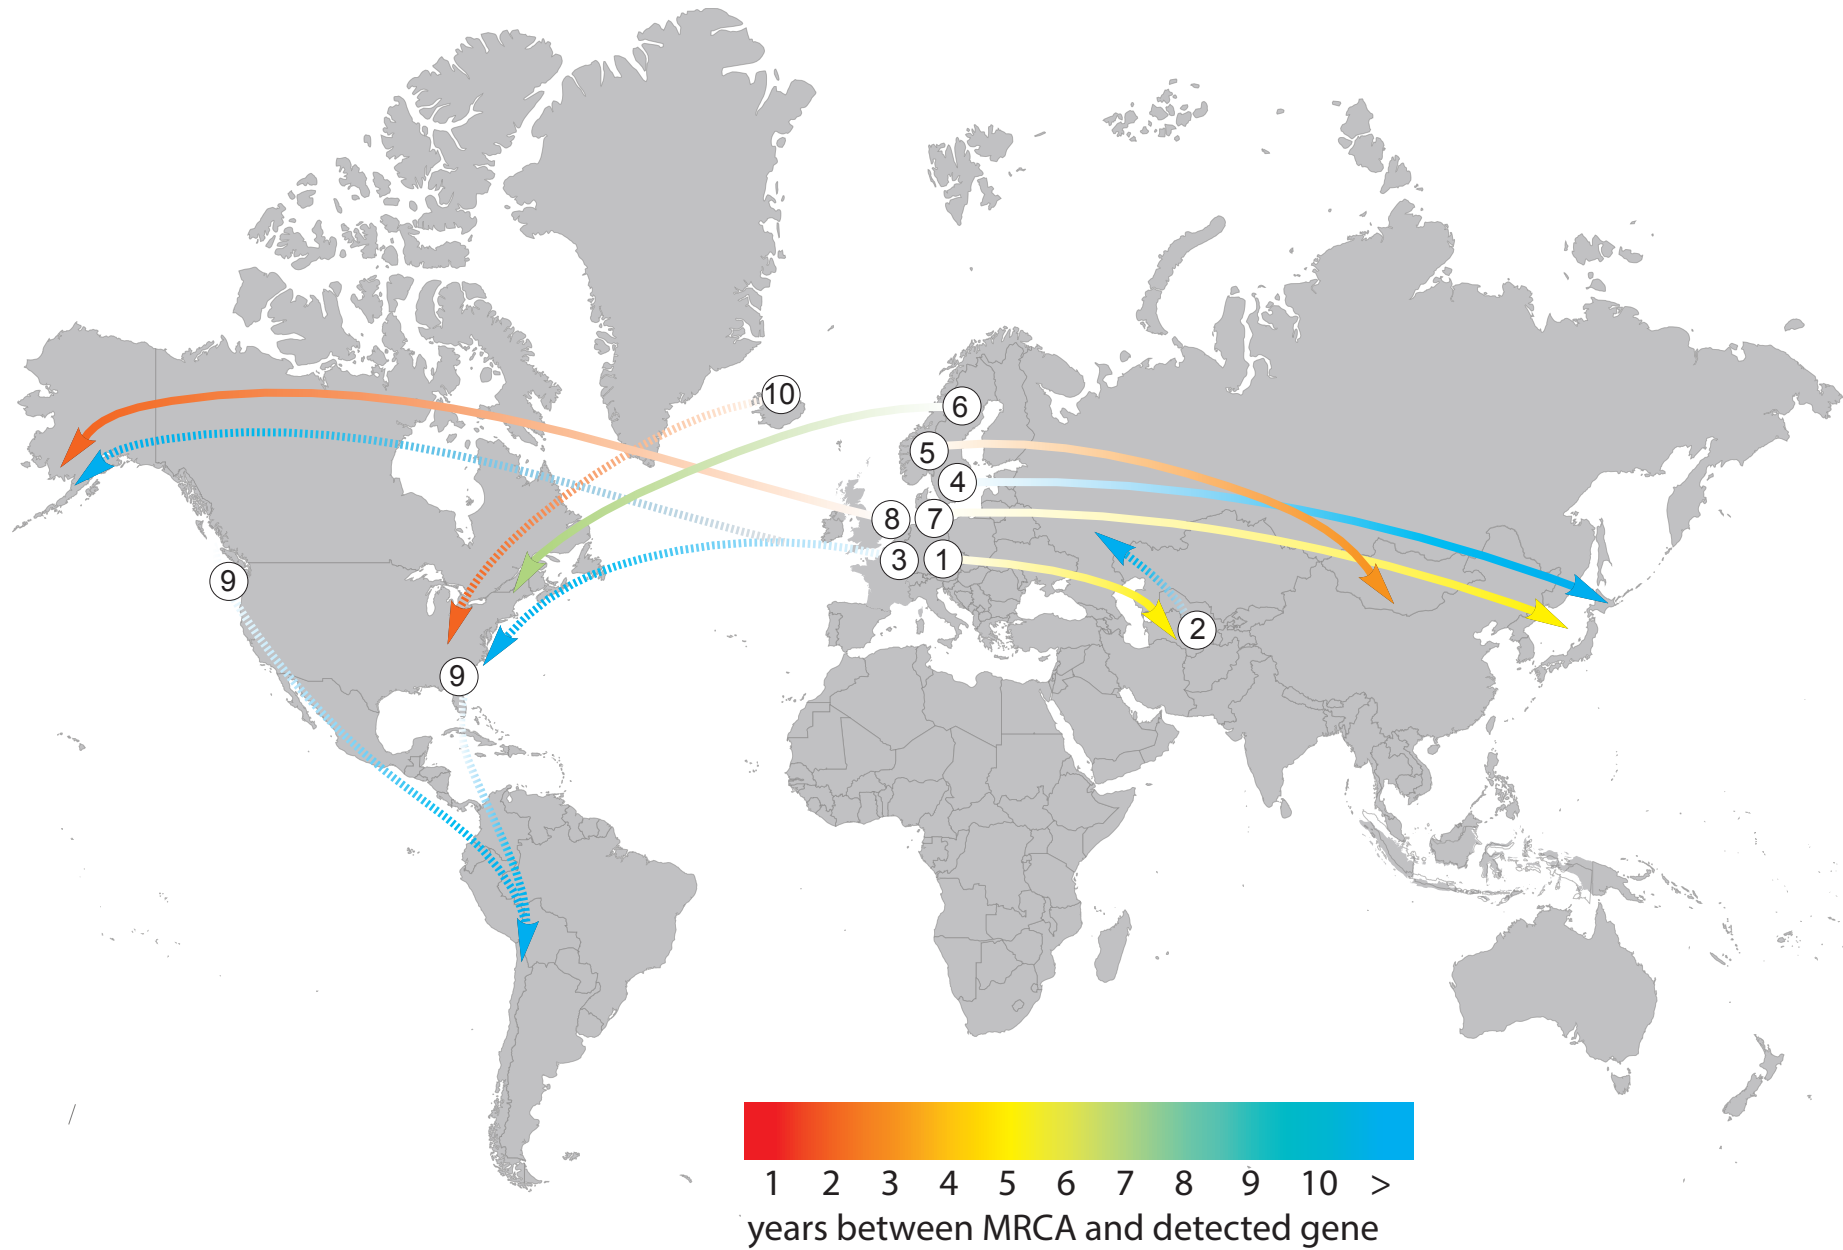



Tabel S1

| Common name                             | Host | Latin name                            | Region  | No. Subtype (%) |        |        |         |          |         |        |        |        |        |       |          |          |         |          |            | Total     |
|-----------------------------------------|------|---------------------------------------|---------|-----------------|--------|--------|---------|----------|---------|--------|--------|--------|--------|-------|----------|----------|---------|----------|------------|-----------|
|                                         |      |                                       |         | H1              | H2     | H3     | H4      | H5       | H6      | H7     | H8     | H9     | H10    | H11   | H12      | H13      | H14     | H15      | H16        |           |
| Armenian gull                           |      | <i>Larus amenicus</i>                 | Eurasia | -               | -      | -      | -       | -        | -       | -      | -      | -      | -      | -     | -        | 2 (100)  | -       | -        | -          | 2 (100)   |
|                                         |      |                                       | America | -               | -      | -      | -       | -        | -       | -      | -      | -      | -      | -     | -        | -        | -       | -        | -          | -         |
| Black-headed gull                       |      | <i>Chroicocephalus ridibundus</i>     | Eurasia | 1 (0)           | 3 (1)  | 1 (0)  | 1 (0)   | 8 (2)    | 1 (0)   | -      | -      | 5 (1)  | 1 (0)  | 3 (1) | -        | 334 (70) | -       | -        | 119 (25)   | 477 (100) |
|                                         |      |                                       | America | -               | -      | -      | -       | -        | -       | -      | -      | -      | -      | -     | -        | -        | -       | -        | -          | -         |
| Black-tailed gull                       |      | <i>Larus crassirostris</i>            | Eurasia | -               | -      | -      | -       | -        | -       | -      | -      | -      | -      | -     | -        | 4 (100)  | -       | -        | -          | 4 (100)   |
|                                         |      |                                       | America | -               | -      | -      | -       | -        | -       | -      | -      | -      | -      | -     | -        | -        | -       | -        | -          | -         |
| Brown-Headed gull                       |      | <i>Chroicocephalus brunnicephalus</i> | Eurasia | -               | -      | -      | -       | 11 (100) | -       | -      | -      | -      | -      | -     | -        | -        | -       | -        | -          | 11 (100)  |
|                                         |      |                                       | America | -               | -      | -      | -       | -        | -       | -      | -      | -      | -      | -     | -        | -        | -       | -        | -          | -         |
| Brown-hooded gull                       |      | <i>Chroicocephalus maculipennis</i>   | Eurasia | -               | -      | -      | -       | -        | -       | -      | -      | -      | -      | -     | -        | -        | -       | -        | -          | -         |
|                                         |      |                                       | America | -               | -      | -      | -       | -        | -       | -      | -      | 1 (20) | -      | -     | -        | -        | 3 (60)  | -        | -          | 1 (20)    |
| California gull                         |      | <i>Larus californicus</i>             | Eurasia | -               | -      | -      | -       | -        | -       | -      | -      | -      | -      | -     | -        | -        | -       | -        | -          | -         |
|                                         |      |                                       | America | -               | -      | -      | -       | -        | -       | -      | -      | -      | 1 (50) | -     | -        | -        | -       | -        | -          | 1 (50)    |
| Dolphin gull                            |      | <i>Leucophaeus scoresbii</i>          | Eurasia | -               | -      | -      | -       | -        | -       | -      | -      | -      | -      | -     | -        | -        | -       | -        | -          | -         |
|                                         |      |                                       | America | -               | -      | -      | -       | -        | -       | -      | -      | -      | -      | -     | -        | -        | -       | -        | -          | 1 (100)   |
| Franklin's gull                         |      | <i>Leucophaeus pipixcan</i>           | Eurasia | -               | -      | -      | -       | -        | -       | -      | -      | -      | -      | -     | -        | -        | -       | -        | -          | -         |
|                                         |      |                                       | America | -               | -      | -      | -       | -        | -       | 1 (7)  | -      | -      | -      | -     | -        | -        | 11 (79) | -        | -          | 2 (14)    |
| Glaucous gull                           |      | <i>Larus hyperboreus</i>              | Eurasia | -               | 2 (50) | -      | -       | -        | -       | -      | -      | -      | -      | -     | -        | 2 (50)   | -       | -        | -          | 4 (100)   |
|                                         |      |                                       | America | -               | -      | 1 (13) | -       | 1 (13)   | 1 (13)  | -      | -      | -      | -      | -     | -        | -        | 4 (50)  | -        | -          | 1 (13)    |
| Glaucous-winged gull                    |      | <i>Larus glaucescens</i>              | Eurasia | -               | -      | -      | -       | -        | -       | -      | -      | -      | -      | -     | -        | -        | -       | -        | -          | -         |
|                                         |      |                                       | America | 1 (1)           | -      | 4 (3)  | 3 (2)   | 4 (3)    | -       | -      | -      | -      | -      | 2 (1) | -        | 41 (26)  | -       | -        | 101 (65)   | 156 (100) |
| Great black-backed gull                 |      | <i>Larus marinus</i>                  | Eurasia | -               | 2 (33) | -      | 1 (17)  | 1 (17)   | -       | -      | -      | -      | -      | -     | -        | 1 (17)   | -       | -        | 1 (17)     | 6 (100)   |
|                                         |      |                                       | America | 1 (20)          | -      | -      | -       | -        | -       | -      | -      | -      | 1 (20) | -     | -        | -        | 2 (40)  | -        | -          | 1 (20)    |
| Great black-headed gull (Pallas's gull) |      | <i>Ichthyaeetus ichthyaeetus</i>      | Eurasia | -               | -      | -      | -       | 12 (55)  | -       | -      | -      | -      | -      | -     | -        | 10 (45)  | -       | -        | -          | 22 (100)  |
|                                         |      |                                       | America | -               | -      | -      | -       | -        | -       | -      | -      | -      | -      | -     | -        | -        | -       | -        | -          | -         |
| Herring gull                            |      | <i>Larus argentatus</i>               | Eurasia | 1 (2)           | 7 (13) | 1 (2)  | 1 (2)   | 3 (6)    | 3 (6)   | -      | -      | -      | 3 (6)  | 4 (8) | -        | 22 (42)  | -       | -        | 8 (15)     | 53 (100)  |
|                                         |      |                                       | America | -               | 5 (12) | 1 (2)  | 1 (2)   | 6 (14)   | 1 (2)   | -      | -      | -      | 1 (2)  | 2 (5) | -        | 14 (33)  | 1 (2)   | -        | -          | 11 (26)   |
| Iceland gull                            |      | <i>Larus glaucooides</i>              | Eurasia | -               | 1 (33) | -      | -       | -        | -       | -      | -      | -      | -      | -     | -        | -        | -       | -        | -          | -         |
|                                         |      |                                       | America | -               | -      | -      | -       | -        | -       | -      | -      | -      | 2 (67) | -     | -        | -        | -       | -        | -          | -         |
| Kelp gull                               |      | <i>Larus dominicanus</i>              | Eurasia | -               | -      | -      | -       | -        | -       | -      | -      | -      | -      | -     | -        | -        | -       | -        | -          | -         |
|                                         |      |                                       | America | -               | -      | 1 (4)  | -       | 2 (8)    | 3 (12)  | -      | -      | -      | -      | -     | -        | -        | 13 (52) | -        | -          | 6 (24)    |
| Laughing gull                           |      | <i>Leucophaeus atricilla</i>          | Eurasia | -               | -      | -      | -       | -        | -       | -      | -      | -      | -      | -     | -        | -        | -       | -        | -          | -         |
|                                         |      |                                       | America | 2 (2)           | 7 (7)  | 8 (8)  | 1 (1)   | 3 (3)    | 16 (16) | 9 (9)  | -      | 7 (7)  | 4 (4)  | 7 (7) | 2 (2)    | 27 (27)  | -       | -        | 8 (8)      | 101 (100) |
| Little gull                             |      | <i>Hydrocoloeus minutus</i>           | Eurasia | -               | -      | -      | -       | -        | -       | -      | -      | -      | -      | -     | -        | 1 (100)  | -       | -        | -          | 1 (100)   |
|                                         |      |                                       | America | -               | -      | -      | -       | -        | -       | -      | -      | -      | -      | -     | -        | -        | -       | -        | -          | -         |
| Mediterranean gull                      |      | <i>Ichthyaeetus melanocephalus</i>    | Eurasia | -               | -      | -      | -       | -        | -       | -      | -      | -      | -      | -     | -        | 1 (25)   | -       | -        | -          | 4 (100)   |
|                                         |      |                                       | America | -               | -      | -      | -       | -        | -       | -      | -      | -      | 3 (75) | -     | -        | -        | -       | -        | -          | -         |
| Mew Gull                                |      | <i>Larus canus</i>                    | Eurasia | -               | -      | -      | -       | 1 (10)   | 1 (10)  | -      | -      | -      | -      | -     | -        | 4 (40)   | -       | -        | 4 (40)     | 10 (100)  |
|                                         |      |                                       | America | -               | -      | -      | -       | -        | -       | -      | -      | -      | -      | -     | -        | -        | -       | -        | -          | 1 (100)   |
| Ring-billed gull                        |      | <i>Larus delawarensis</i>             | Eurasia | -               | -      | -      | -       | -        | -       | -      | -      | -      | -      | -     | -        | -        | -       | -        | -          | -         |
|                                         |      |                                       | America | 5 (7)           | -      | -      | -       | -        | -       | 3 (4)  | -      | -      | -      | -     | 2 (3)    | -        | 55 (82) | -        | -          | 2 (3)     |
| Sabine'S gull                           |      | <i>Xema sabini</i>                    | Eurasia | -               | -      | -      | -       | -        | -       | -      | -      | -      | -      | -     | -        | -        | -       | -        | -          | -         |
|                                         |      |                                       | America | -               | -      | -      | -       | 1 (100)  | -       | -      | -      | -      | -      | -     | -        | -        | -       | -        | -          | -         |
| Slaty-backed gull                       |      | <i>Larus schistisagus</i>             | Eurasia | -               | -      | -      | 2 (50)  | 2 (50)   | -       | -      | -      | -      | -      | -     | -        | -        | -       | -        | -          | 4 (100)   |
|                                         |      |                                       | America | -               | -      | -      | -       | -        | -       | -      | -      | -      | -      | -     | -        | -        | -       | -        | -          | -         |
| Slender-Billed gull                     |      | <i>Chroicocephalus genei</i>          | Eurasia | -               | -      | -      | -       | -        | -       | -      | -      | -      | -      | -     | -        | 1 (50)   | -       | -        | 1 (50)     | 2 (100)   |
|                                         |      |                                       | America | -               | -      | -      | -       | -        | -       | -      | -      | -      | -      | -     | -        | -        | -       | -        | -          | -         |
| Yellow-legged gull                      |      | <i>Larus michahellis</i>              | Eurasia | -               | -      | -      | -       | -        | -       | -      | -      | -      | -      | -     | -        | 13 (100) | -       | -        | -          | 13 (100)  |
|                                         |      |                                       | America | -               | -      | -      | -       | -        | -       | -      | -      | -      | -      | -     | -        | -        | -       | -        | -          | -         |
| Unknown gull species                    |      | Unknown gull species                  | Eurasia | -               | -      | 2 (7)  | 2 (7)   | 3 (10)   | 2 (7)   | 3 (10) | -      | -      | -      | -     | -        | 13 (43)  | -       | -        | 3 (10)     | 30 (100)  |
|                                         |      |                                       | America | 5 (6)           | 5 (6)  | 1 (1)  | 13 (16) | 3 (4)    | 3 (4)   | 2 (3)  | -      | 1 (1)  | 6 (8)  | 4 (5) | -        | 30 (38)  | -       | -        | 7 (9)      | 80 (100)  |
| Total                                   |      |                                       | 16 (1)  | 32 (3)          | 20 (2) | 25 (2) | 61 (5)  | 35 (3)   | 14 (1)  | -      | 18 (2) | 20 (2) | 26 (2) | -     | 606 (52) | 1 (0)    | -       | 279 (24) | 1156 (100) |           |

Table S2

| <b>Virus</b>                                  | <b>Subtype</b>            | <b>Accession number</b>  |
|-----------------------------------------------|---------------------------|--------------------------|
| <a href="#">A/Gull/MD/704/77</a>              | <a href="#">H13N6</a>     | <a href="#">KF612959</a> |
| <a href="#">A/Gull/MD/1815/78</a>             | <a href="#">H13N6</a>     | <a href="#">KF612933</a> |
| <a href="#">A/Gull/MD/3027/78</a>             | <a href="#">H13N9</a>     | <a href="#">KF612945</a> |
| A/Great Black-headed Gull/Astrakhan/1420/1979 | H13N2                     | EU293858                 |
| A/Great Black-headed Gull/Astrakhan/1421/1979 | H13N2                     | EU293859                 |
| A/Gull/Astrakhan/1314/1979                    | H13N2                     | EU835898                 |
| <a href="#">A/Gull/MD/4909/79</a>             | <a href="#">H13N6</a>     | <a href="#">KF612947</a> |
| <a href="#">A/Gull/MD/4985/79</a>             | <a href="#">H13-mixed</a> | <a href="#">KF612942</a> |
| <a href="#">A/Gull/MA/18/80</a>               | <a href="#">H13N6</a>     | <a href="#">KF612943</a> |
| <a href="#">A/Gull/MD/5049/80</a>             | <a href="#">H13N6</a>     | <a href="#">KF612941</a> |
| A/Gull/Minnesota/945/1980                     | H13N6                     | CY014720                 |
| <a href="#">A/Gull/MN/1352/81</a>             | <a href="#">H13N6</a>     | <a href="#">KF612944</a> |
| A/Great Black-headed Gull/Astrakhan/591/1982  | H13N2                     | EU293860                 |
| A/Black-headed Gull/Astrakhan/65/1983         | H13N6                     | EU580577                 |
| A/Great Black-headed Gull/Gurjev/76/1983      | H13N2                     | EU293861                 |
| A/Larus ichthyaetus/Astrakhan/75/1983         | H13N2                     | EU564107                 |
| A/Black-headed Gull/Astrakhan/227/1984        | H13N6                     | M26089                   |
| A/Gull/Astrakhan/226/1984                     | H13N6                     | EU835895                 |
| A/Pilot Whale/Maine/328HN/1984                | H13N2                     | M26091                   |
| <a href="#">A/Gull/ME/16/85</a>               | <a href="#">H13N2</a>     | <a href="#">KF612946</a> |
| A/Herring Gull/Astrakhan/458/1985             | H13N6                     | EU293862                 |
| A/Herring Gull/Astrakhan/479/1985             | H13N6                     | EU293863                 |
| A/Gull/Astrakhan/176/1986                     | H13N2                     | EU835899                 |
| <a href="#">A/Herring Gull/DE/471/86</a>      | <a href="#">H13N7</a>     | <a href="#">KF612934</a> |
| A/Herring Gull/DE/475/1986                    | H13N2                     | CY005914                 |
| A/Herring Gull/NJ/782/1986                    | H13N2                     | CY005932                 |
| <a href="#">A/Laughing Gull/DE/1370/86</a>    | <a href="#">H13N2</a>     | <a href="#">KF612923</a> |
| <a href="#">A/Crab egg/DE/2618/87</a>         | <a href="#">H13N2</a>     | <a href="#">KF612922</a> |
| <a href="#">A/Herring Gull/DE/2591/87</a>     | <a href="#">H13N2</a>     | <a href="#">KF612930</a> |
| <a href="#">A/Laughing Gull/DE/2424/87</a>    | <a href="#">H13N2</a>     | <a href="#">KF612939</a> |
| A/Laughing Gull/DelawareBay/2838/1987         | H13N2                     | CY101422                 |
| <a href="#">A/Ruddy Turnstone/DE/2584/87</a>  | <a href="#">H13N2</a>     | <a href="#">KF612927</a> |
| <a href="#">A/Sandpiper/DE/2516/87</a>        | <a href="#">H13N2</a>     | <a href="#">KF612951</a> |
| <a href="#">A/Crab egg/DE/2347/88</a>         | <a href="#">H13N6</a>     | <a href="#">KF612928</a> |
| <a href="#">A/Herring Gull/DE/2337/88</a>     | <a href="#">H13N2</a>     | <a href="#">KF612924</a> |
| A/Herring Gull/Delaware/660/1988              | H13N6                     | CY014603                 |
| <a href="#">A/Knot/DE/530/88</a>              | <a href="#">H13N6</a>     | <a href="#">KF612925</a> |
| A/Larus ichthyaetus/Astrakhan/10/1988         | H13N6                     | EU564106                 |
| A/Larus ichthyaetus/Astrakhan/44/1988         | H13N6                     | EU564115                 |
| <a href="#">A/Laughing Gull/DE/554/88</a>     | <a href="#">H13N3</a>     | <a href="#">KF612926</a> |
| A/RuddyTurnstone/DelawareBay/520/1988         | H13N9                     | CY126288                 |
| <a href="#">A/Red Knot/NJ/321/89</a>          | <a href="#">H13N4</a>     | <a href="#">KF612940</a> |
| A/Gull/Astrakhan/998/1990                     | H13N6                     | EU835896                 |
| <a href="#">A/Herring Gull/DE/13/90</a>       | <a href="#">H13N2</a>     | <a href="#">KF612938</a> |
| <a href="#">A/Herring Gull/NJ/163/90</a>      | <a href="#">H13-mixed</a> | <a href="#">KF612929</a> |
| <a href="#">A/Turkey/MN/1012/91</a>           | <a href="#">H13N2</a>     | <a href="#">KF612932</a> |
| <a href="#">A/Gull/ND/44036/92</a>            | <a href="#">H13N6</a>     | <a href="#">KF612960</a> |
| <a href="#">A/Gull/NJ/34/92</a>               | <a href="#">H13N6</a>     | <a href="#">KF612936</a> |
| <a href="#">A/Gull/NJ/48/92</a>               | <a href="#">H13-mixed</a> | <a href="#">KF612935</a> |
| <a href="#">A/Laughing Gull/DE/246/93</a>     | <a href="#">H13N6</a>     | <a href="#">KF612931</a> |
| <a href="#">A/Laughing Gull/DE/254/93</a>     | <a href="#">H13N1</a>     | <a href="#">KF612937</a> |
| <a href="#">A/Ruddy Turnstone/DE/179/94</a>   | <a href="#">H13N3</a>     | <a href="#">KF612955</a> |
| <a href="#">A/Shorebird/DE/224/97</a>         | <a href="#">H13N6</a>     | <a href="#">KF612952</a> |
| A/Duck/Siberia/272/1998                       | H13N6                     | AB284988                 |
| A/Gull/Astrakhan/1818/1998                    | H13N6                     | EU835900                 |
| A/Gull/Astrakhan/1846/1998                    | H13N6                     | EU580576                 |
| A/Black-headed Gull/Sweden/1/1999             | H13N6                     | AY684887                 |
| A/Black-headed Gull/Netherlands/1/2000        | H13N8                     | MF146968                 |
| A/Ring-billed Gull/Georgia/AI00-2658/2000     | H13N6                     | CY144202                 |



| <b>Virus</b>                                       | <b>Subtype</b> | <b>Accession number</b> |
|----------------------------------------------------|----------------|-------------------------|
| <b>A/Shorebird/DE/188/2000</b>                     | <b>H13N6</b>   | <b>KF612948</b>         |
| A/Gull/Astrakhan/3483/2002                         | H13N6          | EU835897                |
| A/Larus minutus/Astrakhan/3357/2002                | H13N2          | EU564108                |
| <b>A/Black-headed Gull/Sweden/1/2003</b>           | <b>H13N8</b>   | <b>KR087599</b>         |
| <b>A/Black-headed Gull/Sweden/2/2003</b>           | <b>H13N8</b>   | <b>KR087600</b>         |
| <b>A/Great black-backed Gull/Sweden/1/2003</b>     | <b>H13N6</b>   | <b>KR087577</b>         |
| A/Great Black-headed Gull/Atyrau/743/2004          | H13N6          | GU982281                |
| A/Great Black-headed Gull/Atyrau/744/2004          | H13N6          | GU982282                |
| A/Great Black-headed Gull/Atyrau/767/2004          | H13N6          | GU982283                |
| A/Great Black-headed Gull/Atyrau/773/2004          | H13N6          | GU982284                |
| A/Shorebird/DE/68/2004                             | H13N9          | CY005931                |
| A/Black-headed Gull/Sweden/1/2005                  | H13N8          | CY077000                |
| <b>A/Black-headed Gull/Sweden/10/2005</b>          | <b>H13N6</b>   | <b>KR087578</b>         |
| A/Herring Gull/Finland/9875/2005                   | H13            | KX455108                |
| A/Black-headed Gull/Mongolia/1766/2006             | H13N6          | GQ907302                |
| <b>A/Black-headed Gull/Sweden/1/2006</b>           | <b>H13N8</b>   | <b>KR087597</b>         |
| A/Duck/Hokkaido/W189/2006                          | H13N6          | LC339627                |
| A/Environment/Alabama/NWRC183838-18/2006           | H13N2          | CY122492                |
| A/Environment/Florida/NWRC183796-24/2006           | H13N2          | CY122491                |
| A/Environment/Georgia/NWRC183417-30/2006           | H13N2          | CY122488                |
| A/Environment/Georgia/NWRC184017-60/2006           | H13N2          | CY122502                |
| A/Environment/NewYork/NWRC182181-12/2006           | H13N2          | CY122459                |
| A/Environment/Ohio/NWRC182318-30/2006              | H13N2          | CY122462                |
| A/Glaucous Gull/Alaska/44199-006/2006              | H13N9          | HM059994                |
| A/Glaucous Gull/Alaska/44199-097/2006              | H13N3          | HM059995                |
| A/Glaucous Gull/Alaska/44199-104/2006              | H13N9          | HM059996                |
| A/Herring Gull/Massachusetts/A00080255/2006        | H13N2          | CY239408                |
| A/Herring Gull/Massachusetts/A00080257/2006        | H13N2          | CY239280                |
| A/Herring Gull/Norway/102336/2006                  | H13N6          | FM179758                |
| A/Kelp Gull/Argentina/LDC4/2006                    | H13N9          | EU523136                |
| A/Lesser snow Goose/Alaska/44199-115/2006          | H13N9          | HM059997                |
| A/Shorebird/Delaware/221/2006                      | H13N9          | CY043888                |
| A/Shorebird/Delaware/224/2006                      | H13N9          | CY043896                |
| A/SilverGull/Tasmania/62/2006                      | H13N6          | CY094903                |
| A/American White Pelican/Minnesota/AI-07-1819/2007 | H13N9          | CY054300                |
| <b>A/Black-headed Gull/Netherlands/10/2007</b>     | <b>H13N6</b>   | <b>KR087582</b>         |
| <b>A/Black-headed Gull/Netherlands/2/2007</b>      | <b>H13N6</b>   | <b>KR087579</b>         |
| <b>A/Black-headed Gull/Netherlands/4/2007</b>      | <b>H13N6</b>   | <b>KR087580</b>         |
| <b>A/Black-headed Gull/Netherlands/6/2007</b>      | <b>H13N3</b>   | <b>KR087581</b>         |
| <b>A/Herring Gull/CT/1783-10/07</b>                | <b>H13N3</b>   | <b>KF612954</b>         |
| A/Herring Gull/Finland/9330/2007                   | H13            | KX455109                |
| A/Herring Gull/Finland/9611/2007                   | H13            | KX455110                |
| A/Mongolian Gull/Mongolia/401/2007                 | H13N6          | GQ907310                |
| A/Mongolian Gull/Mongolia/405/2007                 | H13N6          | GQ907318                |
| A/Shorebird/DelawareBay/424/2007                   | H13N9          | CY127799                |
| A/American White Pelican/Minnesota/Sg-0611/2008    | H13N9          | CY054302                |
| A/Black-headed Gull/Netherlands/10/2008            | H13N8          | MF682786                |
| A/Black-headed Gull/Netherlands/102/2008           | H13N8          | KX978024                |
| A/Black-headed Gull/Netherlands/11/2008            | H13N8          | MF147313                |
| A/Black-headed Gull/Netherlands/12/2008            | H13N8          | MF146078                |
| A/Black-headed Gull/Netherlands/13/2008            | H13N8          | MF148122                |
| A/Black-headed Gull/Netherlands/14/2008            | H13N8          | MF145859                |
| A/Black-headed Gull/Netherlands/15/2008            | H13N8          | MF146408                |
| A/Black-headed Gull/Netherlands/16/2008            | H13N8          | MF146171                |
| A/Black-headed Gull/Netherlands/17/2008            | H13N8          | MF146229                |
| A/Black-headed Gull/Netherlands/18/2008            | H13N8          | MF147099                |
| A/Black-headed Gull/Netherlands/19/2008            | H13N8          | MF146117                |
| A/Black-headed Gull/Netherlands/2/2008             | H13N8          | MF146364                |
| A/Black-headed Gull/Netherlands/20/2008            | H13N8          | KX977714                |

| <b>Virus</b>                                    | <b>Subtype</b> | <b>Accession number</b> |
|-------------------------------------------------|----------------|-------------------------|
| A/Black-headed Gull/Netherlands/21/2008         | H13N8          | KX978810                |
| A/Black-headed Gull/Netherlands/22/2008         | H13N8          | MF145892                |
| A/Black-headed Gull/Netherlands/23/2008         | H13N8          | KX978852                |
| A/Black-headed Gull/Netherlands/24/2008         | H13N8          | MF147255                |
| A/Black-headed Gull/Netherlands/25/2008         | H13N8          | KX979286                |
| A/Black-headed Gull/Netherlands/3/2008          | H13N8          | MF146870                |
| A/Black-headed Gull/Netherlands/30/2008         | H13N8          | MF146174                |
| A/Black-headed Gull/Netherlands/35/2008         | H13N8          | MF682817                |
| A/Black-headed Gull/Netherlands/37/2008         | H13N8          | MF146360                |
| A/Black-headed Gull/Netherlands/38/2008         | H13N8          | MF146262                |
| A/Black-headed Gull/Netherlands/39/2008         | H13N8          | MF148072                |
| <b>A/Black-headed Gull/Netherlands/4/2008</b>   | <b>H13N8</b>   | <b>KR087601</b>         |
| A/Black-headed Gull/Netherlands/44/2008         | H13N8          | MF146202                |
| A/Black-headed Gull/Netherlands/48/2008         | H13N8          | MF682688                |
| A/Black-headed Gull/Netherlands/49/2008         | H13N8          | MF147079                |
| A/Black-headed Gull/Netherlands/5/2008          | H13N8          | MF145989                |
| A/Black-headed Gull/Netherlands/51/2008         | H13N8          | MF147023                |
| A/Black-headed Gull/Netherlands/52/2008         | H13N8          | MF145940                |
| A/Black-headed Gull/Netherlands/55/2008         | H13N8          | KX979227                |
| A/Black-headed Gull/Netherlands/6/2008          | H13N8          | MF146566                |
| A/Black-headed Gull/Netherlands/64/2008         | H13N8          | MF147491                |
| A/Black-headed Gull/Netherlands/65/2008         | H13N8          | MF682781                |
| A/Black-headed Gull/Netherlands/66/2008         | H13N8          | MF146391                |
| A/Black-headed Gull/Netherlands/67/2008         | H13N8          | MF146670                |
| A/Black-headed Gull/Netherlands/68/2008         | H13N8          | MF145978                |
| A/Black-headed Gull/Netherlands/7/2008          | H13N8          | MF147648                |
| A/Black-headed Gull/Netherlands/70/2008         | H13N8          | MF146424                |
| A/Black-headed Gull/Netherlands/74/2008         | H13N8          | MF146501                |
| A/Black-headed Gull/Netherlands/8/2008          | H13N8          | MF575016                |
| A/Black-headed Gull/Netherlands/83/2008         | H13N8          | KX979576                |
| A/Black-headed Gull/Netherlands/86/2008         | H13N8          | MF146676                |
| A/Black-headed Gull/Netherlands/87/2008         | H13N8          | MF145996                |
| A/Black-headed Gull/Netherlands/88/2008         | H13N8          | MF147363                |
| A/Black-headed Gull/Netherlands/9/2008          | H13N8          | KX978340                |
| A/Black-headed Gull/Netherlands/93/2008         | H13N8          | MF145945                |
| A/Black-headed Gull/Netherlands/94/2008         | H13N8          | KX978300                |
| A/Black-headed Gull/Netherlands/95/2008         | H13N8          | MF148068                |
| A/Black-headed Gull/Netherlands/96/2008         | H13N8          | KX979163                |
| A/Black-headed Gull/Netherlands/97/2008         | H13N8          | MF147665                |
| A/Great black-backed Gull/Newfoundland/296/2008 | H13N2          | GU724153                |
| A/Herring Gull/Mongolia/454/2008                | H13N8          | JF775470                |
| <b>A/Laughing Gull/AI08-0714/NJ/08</b>          | <b>H13N9</b>   | <b>KF612956</b>         |
| <b>A/Laughing Gull/AI08-1388/NJ/08</b>          | <b>H13N9</b>   | <b>KF612957</b>         |
| <b>A/Laughing Gull/AI08-1460/NJ/08</b>          | <b>H13N9</b>   | <b>KF612958</b>         |
| A/Black-headed Gull/Netherlands/1/2009          | H13N2          | KX979507                |
| A/Black-headed Gull/Netherlands/11/2009         | H13N6          | KX979019                |
| A/Black-headed Gull/Netherlands/13/2009         | H13N2          | MF145916                |
| A/Black-headed Gull/Netherlands/17/2009         | H13N3          | KX978076                |
| A/Black-headed Gull/Netherlands/18/2009         | H13N2          | KX978980                |
| A/Black-headed Gull/Netherlands/2/2009          | H13N2          | MF147797                |
| <b>A/Black-headed Gull/Netherlands/20/2009</b>  | <b>H13N2</b>   | <b>KR087598</b>         |
| A/Black-headed Gull/Netherlands/27/2009         | H13N2          | KX978876                |
| A/Black-headed Gull/Netherlands/29/2009         | H13N6          | KX979544                |
| A/Black-headed Gull/Netherlands/3/2009          | H13N2          | MF146414                |
| A/Black-headed Gull/Netherlands/31/2009         | H13N2          | KX979380                |
| A/Black-headed Gull/Netherlands/33/2009         | H13N2          | KX978020                |
| A/Black-headed Gull/Netherlands/34/2009         | H13N2          | MF682844                |
| A/Black-headed Gull/Netherlands/36/2009         | H13N2          | MF147594                |
| A/Black-headed Gull/Netherlands/37/2009         | H13N2          | KX978043                |



| <b>Virus</b>                                             | <b>Subtype</b> | <b>Accession number</b> |
|----------------------------------------------------------|----------------|-------------------------|
| A/Black-headed Gull/Netherlands/38/2009                  | H13N2          | MF148103                |
| A/Black-headed Gull/Netherlands/39/2009                  | H13N6          | KX979208                |
| A/Black-headed Gull/Netherlands/4/2009                   | H13N2          | MF959989                |
| A/Black-headed Gull/Netherlands/5/2009                   | H13N2          | MF146421                |
| A/Black-headed Gull/Netherlands/6/2009                   | H13N2          | MF147945                |
| <b>A/Black-headed Gull/Netherlands/7/2009</b>            | <b>H13N2</b>   | <b>KR087564</b>         |
| A/Black-headed Gull/Netherlands/8/2009                   | H13N2          | MF147869                |
| A/Black-headed Gull/Netherlands/9/2009                   | H13N2          | KX978293                |
| A/Black-legged Kittiwake/Quebec/02838-1/2009             | H13            | CY125301                |
| A/Common Gull/Norway/101313/2009                         | H13N2          | HE802715                |
| A/Glaucous-winged Gull/SouthcentralAlaska/9JR0691R1/2009 | H13N6          | CY070850                |
| A/Glaucous-winged Gull/SouthcentralAlaska/9JR0738R1/2009 | H13N6          | CY070858                |
| A/Glaucous-winged Gull/SouthcentralAlaska/9JR0747R1/2009 | H13N6          | CY070866                |
| A/Glaucous-winged Gull/SouthcentralAlaska/9JR0769R1/2009 | H13N6          | CY070874                |
| A/Glaucous-winged Gull/SouthcentralAlaska/9JR0781R1/2009 | H13N6          | CY070882                |
| A/Glaucous-winged Gull/SoutheasternAlaska/9JR0822R0/2009 | H13N6          | CY130340                |
| A/Gull/Delaware/AI09-435/2009                            | H13-mixed      | CY145987                |
| A/Hooded Merganser/NewBrunswick/3750/2009                | H13            | CY125309                |
| A/Mallard Black Duck hybrid/NewBrunswick/3736/2009       | H13N6          | CY128958                |
| A/Ring-billed Gull/Quebec/02622-1/2009                   | H13-mixed      | CY125317                |
| <b>A/Ruddy Turnstone/AI09-294/NJ/09</b>                  | <b>H13N6</b>   | <b>KF612950</b>         |
| <b>A/Shorebird/DE/204/2009</b>                           | <b>H13N6</b>   | <b>KF612949</b>         |
| A/Slender-billed gull/CHBZ/11/2009                       | H13N2          | KU684463                |
| A/Black-headed Gull/Netherlands/1/2010                   | H13N6          | KX977814                |
| A/Black-headed Gull/Netherlands/10/2010                  | H13N8          | KX978155                |
| A/Black-headed Gull/Netherlands/12/2010                  | H13N2          | KX978913                |
| A/Black-headed Gull/Netherlands/13/2010                  | H13N2          | KX979541                |
| A/Black-headed Gull/Netherlands/2/2010                   | H13N8          | MF146087                |
| A/Black-headed Gull/Netherlands/4/2010                   | H13N8          | KX977869                |
| A/Black-headed Gull/Netherlands/5/2010                   | H13N8          | MF145955                |
| A/Black-headed Gull/Netherlands/6/2010                   | H13N8          | KX979279                |
| A/Black-headed Gull/Netherlands/7/2010                   | H13N8          | MF682666                |
| A/Black-headed Gull/Netherlands/8/2010                   | H13N2          | KX979026                |
| A/Mallard/Korea/SH38-45/2010                             | H13            | JX030406                |
| <b>A/Ring-billed Gull/AI10-1708/MN/10</b>                | <b>H13N6</b>   | <b>KF612953</b>         |
| A/Yellow-legged Gull/Georgia/1/2010                      | H13N2          | KC541676                |
| A/Black-headed Gull/Georgia/1/2011                       | H13N8          | KC541677                |
| A/Black-headed Gull/Georgia/3/2011                       | H13N8          | KC541680                |
| A/Black-headed Gull/Georgia/6/2011                       | H13N8          | KC541682                |
| A/Black-headed Gull/Georgia/7/2011                       | H13N6          | KC541687                |
| A/Black-headed Gull/Netherlands/10/2011                  | H13N8          | MF147406                |
| A/Black-headed Gull/Netherlands/12/2011                  | H13N8          | MF146180                |
| A/Black-headed Gull/Netherlands/14/2011                  | H13N8          | MF147288                |
| A/Black-headed Gull/Netherlands/15/2011                  | H13N8          | KX979066                |
| <b>A/Black-headed Gull/Netherlands/16/2011</b>           | <b>H13N8</b>   | <b>KR087588</b>         |
| <b>A/Black-headed Gull/Netherlands/17/2011</b>           | <b>H13N8</b>   | <b>KR087589</b>         |
| A/Black-headed Gull/Netherlands/18/2011                  | H13N8          | KX977693                |
| A/Black-headed Gull/Netherlands/19/2011                  | H13N8          | MF145917                |
| A/Black-headed Gull/Netherlands/2/2011                   | H13N8          | KX979383                |
| <b>A/Black-headed Gull/Netherlands/20/2011</b>           | <b>H13N8</b>   | <b>KR087590</b>         |
| A/Black-headed Gull/Netherlands/21/2011                  | H13N8          | KX978666                |
| A/Black-headed Gull/Netherlands/23/2011                  | H13N8          | MF575221                |
| A/Black-headed Gull/Netherlands/24/2011                  | H13N8          | MF575295                |
| A/Black-headed Gull/Netherlands/25/2011                  | H13N8          | MF147953                |
| <b>A/Black-headed Gull/Netherlands/26/2011</b>           | <b>H13N8</b>   | <b>KR087591</b>         |
| <b>A/Black-headed Gull/Netherlands/3/2011</b>            | <b>H13N8</b>   | <b>KR087583</b>         |
| <b>A/Black-headed Gull/Netherlands/35/2011</b>           | <b>H13N8</b>   | <b>KR087592</b>         |
| <b>A/Black-headed Gull/Netherlands/36/2011</b>           | <b>H13N8</b>   | <b>KR087593</b>         |
| <b>A/Black-headed Gull/Netherlands/38/2011</b>           | <b>H13N8</b>   | <b>KR087594</b>         |

| <b>Virus</b>                                              | <b>Subtype</b>        | <b>Accession number</b>  |
|-----------------------------------------------------------|-----------------------|--------------------------|
| <a href="#">A/Black-headed Gull/Netherlands/39/2011</a>   | <a href="#">H13N8</a> | <a href="#">KR087595</a> |
| <a href="#">A/Black-headed Gull/Netherlands/4/2011</a>    | <a href="#">H13N8</a> | <a href="#">KR087584</a> |
| <a href="#">A/Black-headed Gull/Netherlands/5/2011</a>    | <a href="#">H13N8</a> | <a href="#">KR087585</a> |
| <a href="#">A/Black-headed Gull/Netherlands/8/2011</a>    | <a href="#">H13N3</a> | <a href="#">KR087586</a> |
| <a href="#">A/Black-headed Gull/Netherlands/9/2011</a>    | <a href="#">H13N8</a> | <a href="#">KR087587</a> |
| A/Duck/Interior Alaska/11PG00703/2011                     | H13-mixed             | CY195637                 |
| A/Glaucous-winged Gull/Southcentral Alaska/11JR02182/2011 | H13-mixed             | CY195628                 |
| A/Glaucous-winged Gull/Southcentral Alaska/11JR02474/2011 | H13N6                 | CY196611                 |
| A/Yellow-legged Gull/Georgia/1/2011                       | H13N6                 | KC541688                 |
| A/Yellow-legged Gull/Georgia/1/2011                       | H13N8                 | MF146200                 |
| A/Black-headed Gull/Georgia/5/2012                        | H13N6                 | MF682848                 |
| A/Black-headed Gull/Netherlands/1/2012                    | H13N6                 | MF146992                 |
| A/Black-headed Gull/Netherlands/10/2012                   | H13N6                 | MF147689                 |
| A/Black-headed Gull/Netherlands/100/2012                  | H13N6                 | KX978985                 |
| A/Black-headed Gull/Netherlands/101/2012                  | H13N6                 | MF145970                 |
| A/Black-headed Gull/Netherlands/102/2012                  | H13N6                 | KX977943                 |
| A/Black-headed Gull/Netherlands/103/2012                  | H13N6                 | MF147266                 |
| A/Black-headed Gull/Netherlands/104/2012                  | H13N6                 | KX979504                 |
| A/Black-headed Gull/Netherlands/105/2012                  | H13N6                 | KX979468                 |
| A/Black-headed Gull/Netherlands/106/2012                  | H13N6                 | KX978718                 |
| A/Black-headed Gull/Netherlands/108/2012                  | H13N6                 | MF146166                 |
| A/Black-headed Gull/Netherlands/109/2012                  | H13N6                 | KX978793                 |
| A/Black-headed Gull/Netherlands/11/2012                   | H13N6                 | MF148049                 |
| A/Black-headed Gull/Netherlands/110/2012                  | H13N6                 | KX978037                 |
| A/Black-headed Gull/Netherlands/111/2012                  | H13N6                 | MF145899                 |
| A/Black-headed Gull/Netherlands/112/2012                  | H13N6                 | KX978433                 |
| A/Black-headed Gull/Netherlands/113/2012                  | H13N6                 | KX979591                 |
| A/Black-headed Gull/Netherlands/115/2012                  | H13N6                 | KX978183                 |
| A/Black-headed Gull/Netherlands/117/2012                  | H13N6                 | KX978539                 |
| A/Black-headed Gull/Netherlands/118/2012                  | H13N6                 | MF147977                 |
| A/Black-headed Gull/Netherlands/119/2012                  | H13N6                 | MF147208                 |
| A/Black-headed Gull/Netherlands/12/2012                   | H13N6                 | MF147771                 |
| A/Black-headed Gull/Netherlands/120/2012                  | H13N6                 | MF146637                 |
| A/Black-headed Gull/Netherlands/121/2012                  | H13N6                 | KX978308                 |
| A/Black-headed Gull/Netherlands/122/2012                  | H13N6                 | MF146479                 |
| A/Black-headed Gull/Netherlands/123/2012                  | H13N6                 | MF146534                 |
| A/Black-headed Gull/Netherlands/124/2012                  | H13N6                 | MF147740                 |
| A/Black-headed Gull/Netherlands/125/2012                  | H13N6                 | MF146435                 |
| A/Black-headed Gull/Netherlands/126/2012                  | H13N6                 | KX979088                 |
| A/Black-headed Gull/Netherlands/127/2012                  | H13N6                 | MF147719                 |
| A/Black-headed Gull/Netherlands/128/2012                  | H13N6                 | MF147553                 |
| A/Black-headed Gull/Netherlands/129/2012                  | H13N6                 | MF146833                 |
| A/Black-headed Gull/Netherlands/13/2012                   | H13N6                 | MF146523                 |
| A/Black-headed Gull/Netherlands/130/2012                  | H13N6                 | MF147007                 |
| A/Black-headed Gull/Netherlands/131/2012                  | H13N6                 | MF145735                 |
| A/Black-headed Gull/Netherlands/132/2012                  | H13N6                 | MF147533                 |
| A/Black-headed Gull/Netherlands/133/2012                  | H13N6                 | MF147558                 |
| A/Black-headed Gull/Netherlands/134/2012                  | H13N6                 | KX977630                 |
| A/Black-headed Gull/Netherlands/135/2012                  | H13N6                 | MF146431                 |
| A/Black-headed Gull/Netherlands/136/2012                  | H13N6                 | MF146500                 |
| A/Black-headed Gull/Netherlands/137/2012                  | H13N6                 | MF147405                 |
| A/Black-headed Gull/Netherlands/138/2012                  | H13N6                 | MF146583                 |
| A/Black-headed Gull/Netherlands/14/2012                   | H13N6                 | MF147101                 |
| A/Black-headed Gull/Netherlands/15/2012                   | H13N6                 | MF147814                 |
| A/Black-headed Gull/Netherlands/16/2012                   | H13N6                 | MF145897                 |
| A/Black-headed Gull/Netherlands/17/2012                   | H13N6                 | MF147189                 |
| A/Black-headed Gull/Netherlands/18/2012                   | H13N6                 | MF147647                 |
| A/Black-headed Gull/Netherlands/19/2012                   | H13N6                 | MF148130                 |
| A/Black-headed Gull/Netherlands/2/2012                    | H13N6                 | KX977772                 |



| <b>Virus</b>                            | <b>Subtype</b> | <b>Accession number</b> |
|-----------------------------------------|----------------|-------------------------|
| A/Black-headed Gull/Netherlands/20/2012 | H13N6          | MF146063                |
| A/Black-headed Gull/Netherlands/21/2012 | H13N6          | MF147878                |
| A/Black-headed Gull/Netherlands/22/2012 | H13N6          | MF145799                |
| A/Black-headed Gull/Netherlands/23/2012 | H13N6          | KX977887                |
| A/Black-headed Gull/Netherlands/24/2012 | H13N6          | MF147679                |
| A/Black-headed Gull/Netherlands/25/2012 | H13N6          | KX977702                |
| A/Black-headed Gull/Netherlands/26/2012 | H13N6          | MF147342                |
| A/Black-headed Gull/Netherlands/27/2012 | H13N6          | MF146953                |
| A/Black-headed Gull/Netherlands/28/2012 | H13N6          | MF147705                |
| A/Black-headed Gull/Netherlands/29/2012 | H13N6          | MF146506                |
| A/Black-headed Gull/Netherlands/3/2012  | H13N6          | MF146473                |
| A/Black-headed Gull/Netherlands/30/2012 | H13N6          | MF146800                |
| A/Black-headed Gull/Netherlands/31/2012 | H13N6          | MF147302                |
| A/Black-headed Gull/Netherlands/32/2012 | H13N6          | MF146858                |
| A/Black-headed Gull/Netherlands/33/2012 | H13N6          | KX979200                |
| A/Black-headed Gull/Netherlands/34/2012 | H13N6          | MF146167                |
| A/Black-headed Gull/Netherlands/35/2012 | H13N6          | MF147197                |
| A/Black-headed Gull/Netherlands/36/2012 | H13N6          | MF147122                |
| A/Black-headed Gull/Netherlands/37/2012 | H13N6          | MF147911                |
| A/Black-headed Gull/Netherlands/38/2012 | H13N6          | MF147940                |
| A/Black-headed Gull/Netherlands/39/2012 | H13N6          | MF146672                |
| A/Black-headed Gull/Netherlands/4/2012  | H13N6          | MF146383                |
| A/Black-headed Gull/Netherlands/40/2012 | H13N6          | MF147673                |
| A/Black-headed Gull/Netherlands/41/2012 | H13N6          | MF145921                |
| A/Black-headed Gull/Netherlands/42/2012 | H13N6          | KX978470                |
| A/Black-headed Gull/Netherlands/43/2012 | H13N6          | MF147698                |
| A/Black-headed Gull/Netherlands/44/2012 | H13N6          | MF146594                |
| A/Black-headed Gull/Netherlands/45/2012 | H13N6          | MF146496                |
| A/Black-headed Gull/Netherlands/46/2012 | H13N6          | MF145843                |
| A/Black-headed Gull/Netherlands/47/2012 | H13N6          | KX978071                |
| A/Black-headed Gull/Netherlands/48/2012 | H13N6          | MF147537                |
| A/Black-headed Gull/Netherlands/49/2012 | H13N6          | MF146211                |
| A/Black-headed Gull/Netherlands/5/2012  | H13N6          | MF146395                |
| A/Black-headed Gull/Netherlands/50/2012 | H13N6          | MF146634                |
| A/Black-headed Gull/Netherlands/51/2012 | H13N6          | MF148145                |
| A/Black-headed Gull/Netherlands/52/2012 | H13N6          | KX977670                |
| A/Black-headed Gull/Netherlands/53/2012 | H13N6          | MF147610                |
| A/Black-headed Gull/Netherlands/54/2012 | H13N6          | MF145811                |
| A/Black-headed Gull/Netherlands/55/2012 | H13N6          | MF147656                |
| A/Black-headed Gull/Netherlands/56/2012 | H13N6          | MF147422                |
| A/Black-headed Gull/Netherlands/57/2012 | H13N6          | MF147944                |
| A/Black-headed Gull/Netherlands/58/2012 | H13N6          | MF146043                |
| A/Black-headed Gull/Netherlands/59/2012 | H13N6          | MF147717                |
| A/Black-headed Gull/Netherlands/6/2012  | H13N6          | MF146975                |
| A/Black-headed Gull/Netherlands/60/2012 | H13N6          | MF147750                |
| A/Black-headed Gull/Netherlands/61/2012 | H13N6          | MF147841                |
| A/Black-headed Gull/Netherlands/62/2012 | H13N6          | MF146710                |
| A/Black-headed Gull/Netherlands/63/2012 | H13N6          | MF146214                |
| A/Black-headed Gull/Netherlands/64/2012 | H13N6          | MF147469                |
| A/Black-headed Gull/Netherlands/65/2012 | H13N6          | KX977811                |
| A/Black-headed Gull/Netherlands/66/2012 | H13N6          | MF146872                |
| A/Black-headed Gull/Netherlands/67/2012 | H13N6          | MF145901                |
| A/Black-headed Gull/Netherlands/68/2012 | H13N6          | MF146441                |
| A/Black-headed Gull/Netherlands/69/2012 | H13N6          | KX978831                |
| A/Black-headed Gull/Netherlands/7/2012  | H13N6          | MF145876                |
| A/Black-headed Gull/Netherlands/70/2012 | H13N6          | MF146204                |
| A/Black-headed Gull/Netherlands/71/2012 | H13N6          | MF145709                |
| A/Black-headed Gull/Netherlands/72/2012 | H13N6          | KX978101                |
| A/Black-headed Gull/Netherlands/73/2012 | H13N6          | MF147965                |

| <b>Virus</b>                                      | <b>Subtype</b> | <b>Accession number</b> |
|---------------------------------------------------|----------------|-------------------------|
| A/Black-headed Gull/Netherlands/74/2012           | H13N6          | MF148047                |
| A/Black-headed Gull/Netherlands/75/2012           | H13N6          | MF147095                |
| A/Black-headed Gull/Netherlands/76/2012           | H13N6          | KX978834                |
| A/Black-headed Gull/Netherlands/77/2012           | H13N6          | MF146562                |
| A/Black-headed Gull/Netherlands/78/2012           | H13N6          | MF146693                |
| A/Black-headed Gull/Netherlands/79/2012           | H13N6          | MF147375                |
| A/Black-headed Gull/Netherlands/8/2012            | H13N6          | MF146964                |
| A/Black-headed Gull/Netherlands/80/2012           | H13N6          | MF147078                |
| A/Black-headed Gull/Netherlands/81/2012           | H13N6          | KX977728                |
| A/Black-headed Gull/Netherlands/82/2012           | H13N6          | KX979079                |
| A/Black-headed Gull/Netherlands/83/2012           | H13N6          | KX977618                |
| A/Black-headed Gull/Netherlands/84/2012           | H13N6          | MF146502                |
| A/Black-headed Gull/Netherlands/85/2012           | H13N6          | KX979040                |
| A/Black-headed Gull/Netherlands/86/2012           | H13N6          | MF147754                |
| A/Black-headed Gull/Netherlands/87/2012           | H13N6          | KX979045                |
| A/Black-headed Gull/Netherlands/88/2012           | H13N6          | KX978218                |
| A/Black-headed Gull/Netherlands/89/2012           | H13N6          | MF146309                |
| A/Black-headed Gull/Netherlands/9/2012            | H13N6          | MF575308                |
| A/Black-headed Gull/Netherlands/90/2012           | H13N6          | MF147768                |
| A/Black-headed Gull/Netherlands/91/2012           | H13N6          | MF147484                |
| A/Black-headed Gull/Netherlands/92/2012           | H13N6          | KX978027                |
| A/Black-headed Gull/Netherlands/94/2012           | H13N6          | MF682816                |
| A/Black-headed Gull/Netherlands/95/2012           | H13N6          | MF146344                |
| A/Black-headed Gull/Netherlands/96/2012           | H13N6          | MF147573                |
| A/Black-headed Gull/Netherlands/97/2012           | H13N6          | MF147559                |
| A/Black-headed Gull/Netherlands/98/2012           | H13N6          | KX978937                |
| A/Black-headed Gull/Netherlands/99/2012           | H13N6          | KX978911                |
| A/Black-headed Gull/Republic of Georgia/2/2012    | H13N6          | CY185569                |
| A/Duck/Hokkaido/W345/2012                         | H13N2          | LC336769                |
| A/Duck/Hokkaido/WZ68/2012                         | H13N2          | AB812744                |
| A/Gull/Massachusetts/12JR00671/2012               | H13N6          | CY195663                |
| A/Mediterranean gull/Netherlands/1/2012           | H13N6          | MF147925                |
| A/Ring-billed Gull/Massachusetts/12DC00060/2012   | H13N6          | CY195647                |
| A/Ruddy Turnstone/New Jersey/AI12-1737/2012       | H13N6          | MH501657                |
| A/Yellow-legged Gull/Georgia/4/2012               | H13N8          | MF147792                |
| A/Yellow-legged Gull/Republic of Georgia/1/2012   | mixed          | CY185371                |
| A/Yellow-legged Gull/Republic of Georgia/2/2012   | H13N6          | CY185601                |
| A/Yellow-legged Gull/Republic of Georgia/3/2012   | H13N6          | CY185609                |
| A/Yellow-legged Gull/Republic of Georgia/5/2012   | H13N6          | CY185673                |
| A/Yellow-legged Gull/Republic of Georgia/6/2012   | H13N6          | CY185665                |
| A/Black-headed Gull/Netherlands/10/2013           | H13N8          | KX977721                |
| A/Black-headed Gull/Netherlands/6/2013            | H13N8          | MF146245                |
| A/Black-headed Gull/Netherlands/7/2013            | H13N8          | KX977868                |
| A/Black-headed Gull/Netherlands/8/2013            | H13N8          | MF147858                |
| A/Black-headed Gull/Netherlands/9/2013            | H13N8          | MF146285                |
| A/Glaucous-winged Gull/Alaska/387/2013            | H13N2          | KY131017                |
| A/Glaucous-winged Gull/Alaska/410/2013            | H13-mixed      | KY131033                |
| A/Glaucous-winged Gull/Alaska/414/2013            | H13N2          | KY131040                |
| A/Glaucous-winged Gull/Alaska/458/2013            | H13N2          | KY131056                |
| A/Glaucous-winged Gull/Alaska/544/2013            | H13N2          | KY131072                |
| A/Glaucous-winged Gull/Alaska/545/2013            | H13N2          | KY131080                |
| A/Glaucous-winged Gull/Alaska/654/2013            | H13N2          | KY131112                |
| A/Glaucous-winged Gull/Alaska/660/2013            | H13N2          | KY131120                |
| A/Glaucous-winged Gull/Alaska/664/2013            | H13N2          | KY131128                |
| A/Glaucous-winged Gull/Alaska/667/2013            | H13N2          | KY131136                |
| A/Glaucous-winged Gull/Alaska/695/2013            | H13N2          | KY131144                |
| A/Gull/Massachusetts/13JR03320/2013               | H13N6          | CY195825                |
| A/Ring-billed Gull/Massachusetts/13DC30736-1/2013 | H13N8          | CY195801                |
| A/Ring-billed Gull/Massachusetts/13DC30736-2/2013 | H13N8          | CY195809                |



| <b>Virus</b>                                              | <b>Subtype</b> | <b>Accession number</b> |
|-----------------------------------------------------------|----------------|-------------------------|
| A/Yellow-legged Gull/Georgia/1/2013                       | H13N8          | CY185625                |
| A/Yellow-legged Gull/Georgia/2/2013                       | H13N8          | CY185633                |
| A/Black-headed Gull/Netherlands/1/2014                    | H13N2          | KX978817                |
| A/Black-headed Gull/Netherlands/10/2014                   | H13N6          | KX979051                |
| A/Black-headed Gull/Netherlands/11/2014                   | H13N6          | KX977664                |
| A/Black-headed Gull/Netherlands/12/2014                   | H13N2          | KX978367                |
| A/Black-headed Gull/Netherlands/13/2014                   | H13N2          | MF147040                |
| A/Black-headed Gull/Netherlands/14/2014                   | H13N6          | MF147981                |
| A/Black-headed Gull/Netherlands/15/2014                   | H13N6          | KX978686                |
| A/Black-headed Gull/Netherlands/16/2014                   | H13N6          | MF146531                |
| A/Black-headed Gull/Netherlands/17/2014                   | H13N6          | KX979090                |
| A/Black-headed Gull/Netherlands/2/2014                    | H13N2          | MF145726                |
| A/Black-headed Gull/Netherlands/23/2014                   | H13N2          | KX978812                |
| A/Black-headed Gull/Netherlands/24/2014                   | H13N2          | MF147919                |
| A/Black-headed Gull/Netherlands/25/2014                   | H13N2          | KX978026                |
| A/Black-headed Gull/Netherlands/26/2014                   | H13N6          | KX978072                |
| A/Black-headed Gull/Netherlands/27/2014                   | H13N2          | KX977853                |
| A/Black-headed Gull/Netherlands/28/2014                   | H13N6          | KX979165                |
| A/Black-headed Gull/Netherlands/29/2014                   | H13N6          | KX978504                |
| A/Black-headed Gull/Netherlands/3/2014                    | H13N6          | KX977620                |
| A/Black-headed Gull/Netherlands/30/2014                   | H13N6          | MF146090                |
| A/Black-headed Gull/Netherlands/31/2014                   | H13N6          | MF575089                |
| A/Black-headed Gull/Netherlands/32/2014                   | H13N6          | KX978441                |
| A/Black-headed Gull/Netherlands/33/2014                   | H13N6          | MF575196                |
| A/Black-headed Gull/Netherlands/34/2014                   | H13N6          | MF575309                |
| A/Black-headed Gull/Netherlands/35/2014                   | H13N6          | KX978735                |
| A/Black-headed Gull/Netherlands/37/2014                   | H13N2          | MF148148                |
| A/Black-headed Gull/Netherlands/4/2014                    | H13N2          | MF575052                |
| A/Black-headed Gull/Netherlands/5/2014                    | H13N6          | KX978369                |
| A/Black-headed Gull/Netherlands/6/2014                    | H13N2          | KX978977                |
| A/Black-headed Gull/Netherlands/7/2014                    | H13N6          | MF147493                |
| A/Black-headed Gull/Netherlands/8/2014                    | H13N2          | KX978275                |
| A/Black-headed Gull/Netherlands/9/2014                    | H13N2          | MF146305                |
| A/Eurasian curlew/Liaoning/ZH-186/2014                    | H13N6          | KR010435                |
| A/Eurasian curlew/Liaoning/ZH-385/2014                    | H13N8          | KR010443                |
| A/Ruddy Turnstone/New Jersey/UGAI14-1436/2014             | H13N6          | MH502664                |
| A/Glaucous-winged Gull/Alaska/UGAI15-6732/2015            | H13-mixed      | KY131286                |
| A/Glaucous-winged Gull/Alaska/UGAI15-6732/2015            | H13-mixed      | KY131287                |
| A/Glaucous-winged Gull/Southcentral Alaska/15MB01429/2015 | H13N6          | CY213628                |
| A/Glaucous-winged Gull/Southcentral Alaska/15MB01557/2015 | H13N6          | CY213620                |
| A/Glaucous-winged Gull/Southcentral Alaska/15MB01610/2015 | H13N6          | CY213527                |
| A/Glaucous-winged Gull/Southcentral Alaska/15MB01632/2015 | H13N6          | CY213636                |
| A/Glaucous-winged Gull/Southcentral Alaska/15MB01645/2015 | H13N6          | CY213535                |
| A/Glaucous-winged Gull/Southcentral Alaska/15MB01667/2015 | H13-mixed      | CY213644                |
| A/Glaucous-winged Gull/Southcentral Alaska/15MB01693/2015 | H13N6          | CY213543                |
| A/Glaucous-winged Gull/Southcentral Alaska/15MB01694/2015 | H13N6          | CY213663                |
| A/Glaucous-winged Gull/Southcentral Alaska/15MB01776/2015 | H13N6          | CY213687                |
| A/Glaucous-winged Gull/Southcentral Alaska/15MB02016/2015 | H13N8          | CY213695                |
| A/Glaucous-winged Gull/Southcentral Alaska/15MB02018/2015 | H13N8          | CY213703                |
| A/Gull/New Jersey/UGAI15-3767/2015                        | H13N3          | MH501054                |
| A/American oystercatcher/Chile/C20102/2016                | H13N9          | MH499091                |
| A/Black skimmer/Chile/C20057/2016                         | H13N8          | MH498778                |
| A/Black skimmer/Chile/C20077/2016                         | H13N9          | MH499127                |
| A/Black skimmer/Chile/C20084/2016                         | H13N9          | MH498752                |
| A/Black skimmer/Chile/C20100/2016                         | H13N9          | MH499241                |
| A/Black skimmer/Chile/C20108/2016                         | H13N9          | MH499144                |
| A/Black skimmer/Chile/C20123/2016                         | H13N9          | MH499019                |
| A/Black skimmer/Chile/C20124/2016                         | H13N9          | MH498871                |
| A/Black skimmer/Chile/C20140/2016                         | H13N9          | MH499102                |

| <b>Virus</b>                                   | <b>Subtype</b> | <b>Accession number</b> |
|------------------------------------------------|----------------|-------------------------|
| A/Black skimmer/Chile/C20142/2016              | H13N9          | MH499225                |
| A/Black-headed Gull/Netherlands/10/2016        | H13N2          | MF694241                |
| A/Black-headed Gull/Netherlands/11/2016        | H13N2          | MF694057                |
| A/Black-headed Gull/Netherlands/2/2016         | H13N2          | MF694026                |
| A/Black-headed Gull/Netherlands/6/2016         | H13N2          | MF694199                |
| A/Black-headed Gull/Netherlands/7/2016         | H13N2          | MF694207                |
| A/Black-headed Gull/Netherlands/8/2016         | H13N2          | MF693954                |
| A/Black-headed Gull/Netherlands/9/2016         | H13N2          | MF694046                |
| A/Black-tailed Gull/Weihai/115/2016            | H13N2          | MF461180                |
| A/Black-tailed Gull/Weihai/17/2016             | H13N8          | MF461188                |
| A/Black-tailed Gull/Weihai/42/2016             | H13N2          | MH201562                |
| A/Blackish oystercatcher/Chile/C20062/2016     | H13N9          | MH498730                |
| A/Brown-hooded gull/Chile/C10246/2016          | H13N2          | MH499037                |
| A/Elegant tern/Chile/C20085/2016               | H13N9          | MH499011                |
| A/Elegant tern/Chile/C20093/2016               | H13N9          | MH499177                |
| A/Franklin's gull/Chile/C17421/2016            | H13N9          | MH498978                |
| A/Franklin's gull/Chile/C17422/2016            | H13N9          | MH499057                |
| A/Franklin's gull/Chile/C20061/2016            | H13N9          | MH498647                |
| A/Franklin's gull/Chile/C20069/2016            | H13N9          | MH498793                |
| A/Franklin's gull/Chile/C20070/2016            | H13N9          | MH498930                |
| A/Franklin's gull/Chile/C20086/2016            | H13N9          | MH499107                |
| A/Franklin's gull/Chile/C20094/2016            | H13N9          | MH499041                |
| A/Franklin's gull/Chile/C20110/2016            | H13N9          | MH499155                |
| A/Franklin's gull/Chile/C20118/2016            | H13N9          | MH499132                |
| A/Franklin's gull/Chile/C20149/2016            | H13N9          | MH499078                |
| A/Franklin's gull/Chile/C20373/2016            | H13N9          | MH499160                |
| A/Gull/Arica/71/2016                           | H13N2          | MF099262                |
| A/Kelp gull/Chile/C20137/2016                  | H13N9          | MH498851                |
| A/Kelp gull/Chile/C8594/2016                   | H13N2          | MH499186                |
| A/Kelp gull/Chile/C8595/2016                   | H13N2          | MH498919                |
| A/Kelp gull/Chile/C8599/2016                   | H13N2          | MH499244                |
| A/Kelp gull/Chile/C8602/2016                   | H13N2          | MH498862                |
| A/Kelp gull/Chile/C8609/2016                   | H13N2          | MH498888                |
| A/Kelp gull/Chile/C8939/2016                   | H13N2          | MH498698                |
| A/Sandpiper/Southcentral Alaska/16MB01145/2016 | H13-mixed      | CY213503                |
| A/Shorebird/Chile/C7037/2016                   | H13N2          | MH499147                |
| A/Whimbrel/Chile/C20073/2016                   | H13N9          | MH499218                |
| A/Whimbrel/Chile/C20075/2016                   | H13N9          | MH498668                |
| A/Whimbrel/Chile/C20106/2016                   | H13N9          | MH498656                |
| A/Whimbrel/Chile/C20144/2016                   | H13N9          | MH499009                |
| A/Whimbrel/Chile/C20147/2016                   | H13N9          | MH499072                |
| A/White-backed stilt/Chile/C20090/2016         | H13N9          | MH498671                |
| A/Kelp gull/Chile/C27733/2017                  | H13N8          | MH499142                |
| A/Laughing Gull/New Jersey/UGA117-2839/2017    | H13N6          | MH068335                |
| A/Laughing Gull/New Jersey/UGA117-2843/2017    | H13N6          | MH068343                |
| A/Laughing Gull/New Jersey/UGA117-2850/2017    | H13N6          | MH068359                |
| A/Laughing Gull/New Jersey/UGA117-2856/2017    | H13N6          | MH068367                |



Table S3

| <b>Virus</b>                                  | <b>Subtype</b>   | <b>Accession number</b> |
|-----------------------------------------------|------------------|-------------------------|
| A/Black-legged Kittiwake/Alaska/295/1975      | H16N3            | CY015160                |
| A/Black-headed Gull/Turkmenistan/13/1976      | H16N3            | EU293864                |
| A/Slender-billed Gull/Astrakhan/28/1976       | H16N3            | EU293865                |
| <b>A/Gull/MD/4985/79</b>                      | <b>H16-mixed</b> | <b>KF612964</b>         |
| A/Little Tern/Gurjev/779/1983                 | H16N3            | EU148601                |
| A/Mallard/Gurjev/785/1983                     | H16N3            | EU148600                |
| A/Fulica atra/Volga/635/1986                  | H16N3            | EU564109                |
| A/Herring Gull/NewJersey/780/1986             | H16N3            | CY136590                |
| A/Shorebird/NewJersey/840/1986                | H16N3            | CY014599                |
| A/Teal/Volga/671/1986                         | H16N3            | EU148602                |
| A/Herring Gull/DelawareBay/2617/1987          | H16N3            | CY136606                |
| A/Laughing Gull/DelawareBay/2623/1987         | H16N3            | CY136614                |
| A/Laughing Gull/DelawareBay/2839/1987         | H16N3            | CY136630                |
| A/Herring Gull/Delaware/712/1988              | H16N3            | CY136729                |
| <b>A/Herring Gull/NJ/163/90</b>               | <b>H16-mixed</b> | <b>KF612962</b>         |
| <b>A/Gull/NJ/48/92</b>                        | <b>H16-mixed</b> | <b>KF612961</b>         |
| A/Laughing Gull/DelawareBay/296/1998          | H16N3            | CY127445                |
| A/Black-headed Gull/Sweden/2/1999             | H16N3            | AY684888                |
| A/Black-headed Gull/Sweden/3/1999             | H16N3            | AY684889                |
| A/Black-headed Gull/Sweden/4/1999             | H16N3            | AY684890                |
| A/Black-headed Gull/Sweden/5/1999             | H16N3            | AY684891                |
| A/Herring Gull/NewYork/AI00-532/2000          | H16N3            | CY144178                |
| <b>A/Waterfowl/GA/96623-7/01</b>              | <b>H16N3</b>     | <b>KF612963</b>         |
| A/Gull/Denmark/68110/2002                     | H16N3            | GQ247872                |
| <b>A/Black-headed Gull/Sweden/9476/2005</b>   | <b>H16N3</b>     | <b>KR087605</b>         |
| <b>A/Black-headed Gull/Sweden/9478/2005</b>   | <b>H16N3</b>     | <b>MK027211</b>         |
| <b>A/Black-headed Gull/Sweden/9479/2005</b>   | <b>H16N3</b>     | <b>MK027212</b>         |
| <b>A/Black-headed Gull/Sweden/9492/2005</b>   | <b>H16N3</b>     | <b>KR087606</b>         |
| <b>A/Black-headed Gull/Sweden/9502/2005</b>   | <b>H16N3</b>     | <b>KR087607</b>         |
| <b>A/Black-headed Gull/Sweden/9504/2005</b>   | <b>H16N3</b>     | <b>KR087608</b>         |
| A/Herring Gull/Finland/13022/2005             | H16              | KX455114                |
| <b>A/LittleTern/Sweden/8897/2005</b>          | <b>H16N3</b>     | <b>KR087604</b>         |
| A/wildbird/Sweden/1/2005                      | H16N3            | KR087602                |
| A/wildbird/Sweden/2/2005                      | H16N3            | KR087603                |
| A/Black-headed Gull/Mongolia/1756/2006        | H16N3            | GQ907294                |
| A/Common Gull/Norway/101617/2006              | H16N3            | FM179755                |
| A/Environment/Alaska/NWRC184854-12/2006       | H16N3            | CY122507                |
| A/Environment/NewHampshire/NWRC182016-06/2006 | H16N3            | CY122448                |
| A/Environment/Rhodelsland/NWRC182872-06/2006  | H16N3            | CY122476                |
| A/Environment/Utah/NWRC184989-18/2006         | H16N3            | CY122509                |
| A/European Herring Gull/Netherlands/5/2006    | H16N3            | MF147450                |
| A/Glaucous Gull/Alaska/44198-027/2006         | H16N3            | HM059998                |
| A/Herring Gull/Norway/101623/2006             | H16N3            | FM179756                |
| A/Little Tern/Sweden/55316/2006               | H16N3            | KR087616                |
| A/Shorebird/Delaware/168/2006                 | H16N3            | EU030976                |
| A/Shorebird/Delaware/172/2006                 | H16N3            | CY130110                |
| A/Shorebird/Delaware/195/2006                 | H16N3            | CY045383                |
| <b>A/Black-headed Gull/Netherlands/1/2007</b> | <b>H16N3</b>     | <b>KR087609</b>         |
| <b>A/Black-headed Gull/Netherlands/3/2007</b> | <b>H16N3</b>     | <b>KR087610</b>         |
| <b>A/Black-headed Gull/Netherlands/5/2007</b> | <b>H16N3</b>     | <b>KR087611</b>         |
| A/Black-headed Gull/Netherlands/7/2007        | H16N3            | KX978760                |
| <b>A/Black-headed Gull/Netherlands/8/2007</b> | <b>H16N3</b>     | <b>KR087612</b>         |
| <b>A/Black-headed Gull/Netherlands/9/2007</b> | <b>H16N3</b>     | <b>KR087613</b>         |
| <b>A/Environment/CO/492008/07</b>             | <b>H16N3</b>     | <b>KF612965</b>         |
| A/Black-headed Gull/Netherlands/100/2008      | H16N3            | MF147121                |
| A/Black-headed Gull/Netherlands/101/2008      | H16N3            | KX978252                |
| A/Black-headed Gull/Netherlands/26/2008       | H16N3            | MF147314                |
| A/Black-headed Gull/Netherlands/27/2008       | H16N3            | MF146654                |
| A/Black-headed Gull/Netherlands/28/2008       | H16N3            | MF146238                |

| <b>Virus</b>                                              | <b>Subtype</b> | <b>Accession number</b> |
|-----------------------------------------------------------|----------------|-------------------------|
| A/Black-headed Gull/Netherlands/29/2008                   | H16N3          | MF146193                |
| A/Black-headed Gull/Netherlands/33/2008                   | H16N3          | MF148040                |
| A/Black-headed Gull/Netherlands/36/2008                   | H16N3          | MF147982                |
| A/Black-headed Gull/Netherlands/40/2008                   | H16N3          | MF146828                |
| A/Black-headed Gull/Netherlands/41/2008                   | H16N3          | MF146643                |
| A/Black-headed Gull/Netherlands/42/2008                   | H16N3          | MF145764                |
| A/Black-headed Gull/Netherlands/43/2008                   | H16N8          | MF147250                |
| A/Black-headed Gull/Netherlands/45/2008                   | H16N3          | MF146076                |
| A/Black-headed Gull/Netherlands/46/2008                   | H16N3          | MF146816                |
| A/Black-headed Gull/Netherlands/47/2008                   | H16N3          | MF146537                |
| A/Black-headed Gull/Netherlands/50/2008                   | H16N3          | MF145888                |
| A/Black-headed Gull/Netherlands/53/2008                   | H16N3          | MF146769                |
| A/Black-headed Gull/Netherlands/54/2008                   | H16N3          | MF147728                |
| A/Black-headed Gull/Netherlands/56/2008                   | H16N3          | MF146014                |
| A/Black-headed Gull/Netherlands/57/2008                   | H16N3          | MF146085                |
| A/Black-headed Gull/Netherlands/59/2008                   | H16N3          | MF147239                |
| A/Black-headed Gull/Netherlands/60/2008                   | H16N3          | MF146436                |
| A/Black-headed Gull/Netherlands/61/2008                   | H16N3          | MF682709                |
| A/Black-headed Gull/Netherlands/62/2008                   | H16N3          | MF147547                |
| A/Black-headed Gull/Netherlands/63/2008                   | H16N3          | KX979453                |
| A/Black-headed Gull/Netherlands/69/2008                   | H16N3          | MF145725                |
| A/Black-headed Gull/Netherlands/72/2008                   | H16N3          | MF146541                |
| A/Black-headed Gull/Netherlands/75/2008                   | H16N3          | MF147192                |
| A/Black-headed Gull/Netherlands/76/2008                   | H16N3          | MF146737                |
| A/Black-headed Gull/Netherlands/77/2008                   | H16N3          | MF146931                |
| A/Black-headed Gull/Netherlands/78/2008                   | H16N3          | MF146836                |
| A/Black-headed Gull/Netherlands/79/2008                   | H16N3          | MF147849                |
| A/Black-headed Gull/Netherlands/80/2008                   | H16N3          | MF146060                |
| A/Black-headed Gull/Netherlands/81/2008                   | H16N3          | KX977730                |
| A/Black-headed Gull/Netherlands/82/2008                   | H16N3          | MF146767                |
| A/Black-headed Gull/Netherlands/84/2008                   | H16N3          | MF147070                |
| A/Black-headed Gull/Netherlands/85/2008                   | H16N3          | MF146577                |
| A/Black-headed Gull/Netherlands/89/2008                   | H16N3          | MF148111                |
| A/Black-headed Gull/Netherlands/91/2008                   | H16N3          | MF147657                |
| A/Black-headed Gull/Netherlands/92/2008                   | H16N3          | KX978323                |
| A/Black-headed Gull/Netherlands/98/2008                   | H16N3          | KX979456                |
| A/Black-headed Gull/Netherlands/99/2008                   | H16N3          | KX978955                |
| A/Glaucous-winged Gull/Southcentral Alaska/12NH01265/2008 | H16N3          | CY196748                |
| A/Glaucous-winged Gull/Southcentral Alaska/12NH01285/2008 | H16N3          | CY196756                |
| A/Glaucous-winged Gull/Southcentral Alaska/12NH01518/2008 | H16N3          | CY196764                |
| A/Glaucous-winged Gull/Southcentral Alaska/12NH01538/2008 | H16N3          | CY196772                |
| A/Glaucous-winged Gull/Southcentral Alaska/12NH01540/2008 | H16N3          | CY196780                |
| A/Glaucous-winged Gull/Southcentral Alaska/12NH01593/2008 | H16N3          | CY196788                |
| A/Glaucous-winged Gull/Southcentral Alaska/12NH01600/2008 | H16N3          | CY196796                |
| A/Glaucous-winged Gull/Southcentral Alaska/12NH01647/2008 | H16N3          | CY196804                |
| A/Glaucous-winged Gull/Southcentral Alaska/12NH01679/2008 | H16N3          | CY196812                |
| A/Great black-backed Gull/Netherlands/1/2008              | H16N3          | MF146805                |
| <b>A/Black-headed Gull/Netherlands/10/2009</b>            | <b>H16N3</b>   | <b>KR087614</b>         |
| A/Black-headed Gull/Netherlands/12/2009                   | H16N3          | MF147927                |
| A/Black-headed Gull/Netherlands/14/2009                   | H16N3          | KX978997                |
| A/Black-headed Gull/Netherlands/15/2009                   | H16N3          | MF146410                |
| A/Black-headed Gull/Netherlands/16/2009                   | H16N3          | KX978083                |
| A/Black-headed Gull/Netherlands/19/2009                   | H16N3          | MF146148                |
| <b>A/Black-headed Gull/Netherlands/21/2009</b>            | <b>H16N3</b>   | <b>KR087615</b>         |
| A/Black-headed Gull/Netherlands/22/2009                   | H16N3          | KX978709                |
| A/Black-headed Gull/Netherlands/23/2009                   | H16N3          | MF146268                |
| A/Black-headed Gull/Netherlands/24/2009                   | H16N3          | MF103719                |
| A/Black-headed Gull/Netherlands/25/2009                   | H16N3          | MF147715                |
| <b>A/Black-headed Gull/Netherlands/26/2009</b>            | <b>H16N3</b>   | <b>KR087572</b>         |



| <b>Virus</b>                                               | <b>Subtype</b> | <b>Accession number</b> |
|------------------------------------------------------------|----------------|-------------------------|
| A/Black-headed Gull/Netherlands/28/2009                    | H16N3          | KX977785                |
| A/Black-headed Gull/Netherlands/32/2009                    | H16N3          | KX979111                |
| A/Black-headed Gull/Netherlands/35/2009                    | H16N3          | KX979094                |
| A/Mallard/Quebec/02916-1/2009                              | H16            | CY125606                |
| A/Black-headed Gull/Iceland/713/2010                       | H16N3          | CY138145                |
| A/Black-headed Gull/Netherlands/11/2010                    | H16N3          | KX977650                |
| A/Black-headed Gull/Netherlands/14/2010                    | H16N3          | KX977766                |
| A/Black-headed Gull/Netherlands/3/2010                     | H16N3          | KX978612                |
| A/Black-headed Gull/Netherlands/9/2010                     | H16N3          | KX978651                |
| A/European Herring Gull/Netherlands/1/2010                 | H16N3          | KX979488                |
| A/Glaucous-winged Gull/Southcentral Alaska/10JR01814/2010  | H16N3          | CY196009                |
| A/Glaucous-winged Gull/SoutheasternAlaska/10JR01572R0/2010 | H16N3          | CY130493                |
| A/Glaucous-winged Gull/SoutheasternAlaska/10JR01681R0/2010 | H16N3          | CY130501                |
| A/Glaucous-winged Gull/SoutheasternAlaska/10JR01700R0/2010 | H16N3          | CY130509                |
| A/Glaucous-winged Gull/SoutheasternAlaska/10JR01811R0/2010 | H16N3          | CY130517                |
| A/Gull/SoutheasternAlaska/10JR01527R0/2010                 | H16N3          | CY130485                |
| A/Herring Gull/Newfoundland/GR032/2010                     | H16N3          | KC845043                |
| A/Black-headed Gull/Netherlands/1/2011                     | H16N3          | KX978434                |
| A/Black-headed Gull/Netherlands/11/2011                    | H16N3          | MF147513                |
| A/Black-headed Gull/Netherlands/13/2011                    | H16N3          | KX978398                |
| A/Black-headed Gull/Netherlands/22/2011                    | H16N3          | MF575026                |
| A/Black-headed Gull/Netherlands/27/2011                    | H16N3          | MF146675                |
| A/Black-headed Gull/Netherlands/28/2011                    | H16N3          | MF146920                |
| A/Black-headed Gull/Netherlands/29/2011                    | H16N3          | KX979432                |
| A/Black-headed Gull/Netherlands/30/2011                    | H16N3          | MF145738                |
| A/Black-headed Gull/Netherlands/31/2011                    | H16N3          | MF147961                |
| A/Black-headed Gull/Netherlands/32/2011                    | H16N3          | KX979603                |
| A/Black-headed Gull/Netherlands/33/2011                    | H16N3          | MF146352                |
| A/Black-headed Gull/Netherlands/34/2011                    | H16N3          | MF147682                |
| A/Black-headed Gull/Netherlands/37/2011                    | H16N3          | MF146714                |
| A/Black-headed Gull/Netherlands/6/2011                     | H16N3          | MF146111                |
| A/Black-headed Gull/Netherlands/7/2011                     | H16N3          | MF575109                |
| A/Glaucous-winged Gull/Southcentral Alaska/11JR00366/2011  | H16N3          | CY196403                |
| A/Glaucous-winged Gull/Southcentral Alaska/11JR01368/2011  | H16N3          | CY196411                |
| A/Glaucous-winged Gull/Southcentral Alaska/11JR01710/2011  | H16N3          | CY196419                |
| A/Glaucous-winged Gull/Southcentral Alaska/11JR01711/2011  | H16N3          | CY196427                |
| A/Glaucous-winged Gull/Southcentral Alaska/11JR01712/2011  | H16N3          | CY196435                |
| A/Glaucous-winged Gull/Southcentral Alaska/11JR01713/2011  | H16N3          | CY196443                |
| A/Glaucous-winged Gull/Southcentral Alaska/11JR01716/2011  | H16N3          | CY196451                |
| A/Glaucous-winged Gull/Southcentral Alaska/11JR01719/2011  | H16N3          | CY196459                |
| A/Glaucous-winged Gull/Southcentral Alaska/11JR01722/2011  | H16-mixed      | CY195614                |
| A/Glaucous-winged Gull/Southcentral Alaska/11JR01724/2011  | H16N3          | CY196467                |
| A/Glaucous-winged Gull/Southcentral Alaska/11JR01725/2011  | H16N3          | CY196475                |
| A/Glaucous-winged Gull/Southcentral Alaska/11JR01732/2011  | H16N3          | CY196483                |
| A/Glaucous-winged Gull/Southcentral Alaska/11JR01733/2011  | H16N3          | CY196491                |
| A/Glaucous-winged Gull/Southcentral Alaska/11JR01734/2011  | H16N3          | CY196499                |
| A/Glaucous-winged Gull/Southcentral Alaska/11JR01736/2011  | H16N3          | CY196507                |
| A/Glaucous-winged Gull/Southcentral Alaska/11JR01738/2011  | H16N3          | CY196515                |
| A/Glaucous-winged Gull/Southcentral Alaska/11JR01739/2011  | H16N3          | CY196523                |
| A/Glaucous-winged Gull/Southcentral Alaska/11JR01761/2011  | H16N3          | CY196531                |
| A/Glaucous-winged Gull/Southcentral Alaska/11JR01785/2011  | H16N3          | CY196539                |
| A/Glaucous-winged Gull/Southcentral Alaska/11JR01852/2011  | H16N3          | CY196547                |
| A/Glaucous-winged Gull/Southcentral Alaska/11JR01859/2011  | H16N3          | CY196555                |
| A/Glaucous-winged Gull/Southcentral Alaska/11JR01871/2011  | H16N3          | CY196563                |
| A/Glaucous-winged Gull/Southcentral Alaska/11JR01902/2011  | H16N3          | CY196571                |
| A/Glaucous-winged Gull/Southcentral Alaska/11JR01906/2011  | H16N3          | CY196579                |
| A/Glaucous-winged Gull/Southcentral Alaska/11JR01908/2011  | H16N3          | CY196587                |
| A/Glaucous-winged Gull/Southcentral Alaska/11JR02017/2011  | H16N3          | CY196595                |
| A/Glaucous-winged Gull/Southcentral Alaska/11JR02272/2011  | H16N3          | CY196603                |

| <b>Virus</b>                                              | <b>Subtype</b> | <b>Accession number</b> |
|-----------------------------------------------------------|----------------|-------------------------|
| A/Black-headed Gull/Netherlands/107/2012                  | H16N3          | KX978749                |
| A/Black-headed Gull/Netherlands/114/2012                  | H16N3          | KX977892                |
| A/Black-headed Gull/Netherlands/93/2012                   | H16N3          | KX979159                |
| A/Black-headed Gull/Republic of Georgia/4/2012            | H16N3          | CY185585                |
| A/Environment/California/1242V/2012                       | H16N3          | CY176997                |
| A/Glaucous-winged Gull/Southcentral Alaska/12MB01573/2012 | H16N3          | CY195671                |
| A/Glaucous-winged Gull/Southcentral Alaska/12MB01577/2012 | H16N3          | CY195679                |
| A/Glaucous-winged Gull/Southcentral Alaska/12MB01618/2012 | H16N3          | CY195687                |
| A/Glaucous-winged Gull/Southcentral Alaska/12MB01620/2012 | H16N3          | CY195695                |
| A/Glaucous-winged Gull/Southcentral Alaska/12MB01812/2012 | H16N3          | CY195703                |
| A/Glaucous-winged Gull/Southcentral Alaska/12MB01823/2012 | H16N3          | CY195711                |
| A/Glaucous-winged Gull/Southcentral Alaska/12NH01263/2012 | H16N3          | CY195785                |
| A/Glaucous-winged Gull/Southcentral Alaska/12NH01632/2012 | H16N3          | CY195793                |
| A/Gull/Massachusetts/12JR00662/2012                       | H16N3          | CY195655                |
| A/Black-headed Gull/Netherlands/2/2013                    | H16N3          | KX977836                |
| A/Black-headed Gull/Netherlands/3/2013                    | H16N3          | KX978186                |
| A/Black-headed Gull/Netherlands/4/2013                    | H16N3          | KX979151                |
| A/Black-headed Gull/Netherlands/5/2013                    | H16N3          | KX978693                |
| A/California Gull/California/1196P/2013                   | H16N3          | CY177441                |
| A/Duck/Hokkaido/WZ82/2013                                 | H16N3          | AB937721                |
| A/Duck/Hokkaido/WZ82/2013                                 | H16N3          | LC339707                |
| A/Glaucous-winged Gull/Alaska/567/2013                    | H16N3          | KY131088                |
| A/Glaucous-winged Gull/Southcentral Alaska/13MB01431/2013 | H16N3          | CY239288                |
| A/Glaucous-winged Gull/Southcentral Alaska/13MB02410/2013 | H16N3          | CY239296                |
| A/Glaucous-winged Gull/Southcentral Alaska/13MB02526/2013 | H16N3          | CY213711                |
| A/Glaucous-winged Gull/Southcentral Alaska/13MB02527/2013 | H16N3          | CY213719                |
| A/Glaucous-winged Gull/Southcentral Alaska/13MB02558/2013 | H16N3          | CY213727                |
| A/Glaucous-winged Gull/Southcentral Alaska/13MB02561/2013 | H16N3          | CY213735                |
| A/Glaucous-winged Gull/Southcentral Alaska/13MB02569/2013 | H16N3          | CY213743                |
| A/Glaucous-winged Gull/Southcentral Alaska/13MB02582/2013 | H16N3          | CY213751                |
| A/Glaucous-winged Gull/Southcentral Alaska/13MB02593/2013 | H16N3          | CY213759                |
| A/Glaucous-winged Gull/Southcentral Alaska/13MB02599/2013 | H16N3          | CY213767                |
| A/Gull/Massachusetts/13WP00522/2013                       | H16N3          | CY195833                |
| A/Gull/Massachusetts/13WP00539/2013                       | H16N3          | CY195841                |
| A/Laughing Gull/New Jersey/AI13-1937/2013                 | H16N3          | MH501070                |
| A/Ruddy Turnstone/New Jersey/AI13-2872/2013               | H16N3          | MH502494                |
| A/Black-headed Gull/Netherlands/18/2014                   | H16N3          | MF146608                |
| A/Black-headed Gull/Netherlands/36/2014                   | H16N3          | MF575190                |
| A/European Herring Gull/Netherlands/2/2014                | H16N3          | MF147061                |
| A/Glaucous-winged Gull/Alaska/915/2014                    | H16N3          | KT338609                |
| A/Glaucous-winged Gull/Southcentral Alaska/14MB00623/2014 | H16N3          | CY206862                |
| A/Glaucous-winged Gull/Southcentral Alaska/14MB01306/2014 | H16N3          | CY206870                |
| A/Glaucous-winged Gull/Southcentral Alaska/14MB01318/2014 | H16N3          | CY206878                |
| A/Glaucous-winged Gull/Southcentral Alaska/14MB01336/2014 | H16N3          | CY206677                |
| A/Glaucous-winged Gull/Southcentral Alaska/14MB01383/2014 | H16N3          | CY206886                |
| A/Glaucous-winged Gull/Southcentral Alaska/14MB01392/2014 | H16N3          | CY206894                |
| A/Glaucous-winged Gull/Southcentral Alaska/14MB01417/2014 | H16N3          | CY206902                |
| A/Glaucous-winged Gull/Southcentral Alaska/14MB01418/2014 | H16N3          | CY206910                |
| A/Glaucous-winged Gull/Southcentral Alaska/14MB01422/2014 | H16N3          | CY206918                |
| A/Glaucous-winged Gull/Southcentral Alaska/14MB01438/2014 | H16N3          | CY206926                |
| A/Glaucous-winged Gull/Southcentral Alaska/14MB01444/2014 | H16N3          | CY239304                |
| A/Glaucous-winged Gull/Southcentral Alaska/14MB01615/2014 | H16N3          | CY206934                |
| A/Glaucous-winged Gull/Southcentral Alaska/14MB01705/2014 | H16N3          | CY206942                |
| A/Glaucous-winged Gull/Southcentral Alaska/14MB01770/2014 | H16N3          | CY206950                |
| A/Glaucous-winged Gull/Southcentral Alaska/14MB01819/2014 | H16N3          | CY206958                |
| A/Glaucous-winged Gull/Southcentral Alaska/14MB01884/2014 | H16N3          | CY206966                |
| A/Glaucous-winged Gull/Southcentral Alaska/14MB01886/2014 | H16N3          | CY206974                |
| A/Glaucous-winged Gull/Southcentral Alaska/14MB01893/2014 | H16N3          | CY206982                |
| A/Glaucous-winged Gull/Southcentral Alaska/14MB01926/2014 | H16N3          | CY206990                |

| <b>Virus</b>                                              | <b>Subtype</b> | <b>Accession number</b> |
|-----------------------------------------------------------|----------------|-------------------------|
| A/Glaucous-winged Gull/Southcentral Alaska/14MB01959/2014 | H16N3          | CY206998                |
| A/Glaucous-winged Gull/Southcentral Alaska/14MB02018/2014 | H16N3          | CY207006                |
| A/Glaucous-winged Gull/Southcentral Alaska/14MB02081/2014 | H16N3          | CY207014                |
| A/Glaucous-winged Gull/Southcentral Alaska/14MB02094/2014 | H16N3          | CY239312                |
| A/Mallard/Alaska/903/2014                                 | H16N3          | KT338601                |
| A/Northern pintail/Alaska/886/2014                        | H16N3          | KT338585                |
| A/Black-headed Gull/Netherlands/1/2015                    | H16N3          | MF147650                |
| A/Black-headed Gull/Netherlands/2/2015                    | H16N3          | KX978663                |
| A/Black-headed Gull/Netherlands/3/2015                    | H16N3          | KX978028                |
| A/Black-headed Gull/Netherlands/4/2015                    | H16N3          | KX978525                |
| A/Black-headed Gull/Netherlands/5/2015                    | H16N3          | KX977739                |
| A/European Herring Gull/Netherlands/3/2015                | H16N3          | MF693968                |
| A/Glaucous-winged Gull/Southcentral Alaska/15MB01680/2015 | H16N3          | CY213655                |
| A/Glaucous-winged Gull/Southcentral Alaska/15MB01735/2015 | H16N3          | CY213551                |
| A/Glaucous-winged Gull/Southcentral Alaska/15MB01747/2015 | H16N3          | CY213671                |
| A/Glaucous-winged Gull/Southcentral Alaska/15MB01758/2015 | H16N3          | CY213679                |
| A/Gull/New Jersey/UGAI15-3414/2015                        | H16N3          | MH501022                |
| A/Gull/New Jersey/UGAI15-3459/2015                        | H16N3          | MH501038                |
| A/Lesser black-backed Gull/Netherlands/1/2015             | H16N3          | MF694110                |
| A/Black-headed Gull/Netherlands/1/2016                    | H16N3          | MF694134                |
| A/Black-headed Gull/Netherlands/3/2016                    | H16N3          | MF694124                |
| A/Brown-hooded gull/Chile/C8851/2016                      | H16N3          | MH498904                |
| A/Environment/New Jersey/UGAI16-0787/2016                 | H16N3          | CY240828                |
| A/Environment/New Jersey/UGAI16-0887/2016                 | H16-mixed      | CY240896                |
| A/Environment/New Jersey/UGAI16-1048/2016                 | H16N3          | CY240948                |
| A/Environment/New Jersey/UGAI16-1713/2016                 | H16N3          | CY241634                |
| A/Franklin's gull/Chile/C10784/2016                       | H16N3          | MH134702                |
| A/Franklin's gull/Chile/C10794/2016                       | H16N3          | MH134685                |
| A/Glaucous-winged Gull/Southcentral Alaska/16MB00031/2016 | H16N3          | CY239376                |
| A/Glaucous-winged Gull/Southcentral Alaska/16MB00033/2016 | H16N3          | CY239269                |
| A/Glaucous-winged Gull/Southcentral Alaska/16MB02936/2016 | H16N3          | CY239320                |
| A/Glaucous-winged Gull/Southcentral Alaska/16MB02941/2016 | H16N3          | CY239328                |
| A/Glaucous-winged Gull/Southcentral Alaska/16MB02942/2016 | H16N3          | CY239336                |
| A/Glaucous-winged Gull/Southcentral Alaska/16MB02960/2016 | H16N3          | CY239344                |
| A/Glaucous-winged Gull/Southcentral Alaska/16MB03027/2016 | H16N3          | CY239352                |
| A/Glaucous-winged Gull/Southcentral Alaska/16MB03039/2016 | H16N3          | CY239360                |
| A/Glaucous-winged Gull/Southcentral Alaska/16MB03046/2016 | H16N3          | CY239368                |
| A/Glaucous-winged Gull/Southcentral Alaska/16MB03089/2016 | H16N3          | CY239384                |
| A/Glaucous-winged Gull/Southcentral Alaska/16MB03160/2016 | H16N3          | CY239392                |
| A/Sandpiper/Southcentral Alaska/16MB01145/2016            | H16-mixed      | CY213504                |
